# Supplementary material
Source: publisher figshare collection journal article supplement (https://tandf.figshare.com/ndownloader/files/39658280)

**Appendix F:** **Original Results of the Questionnaire**


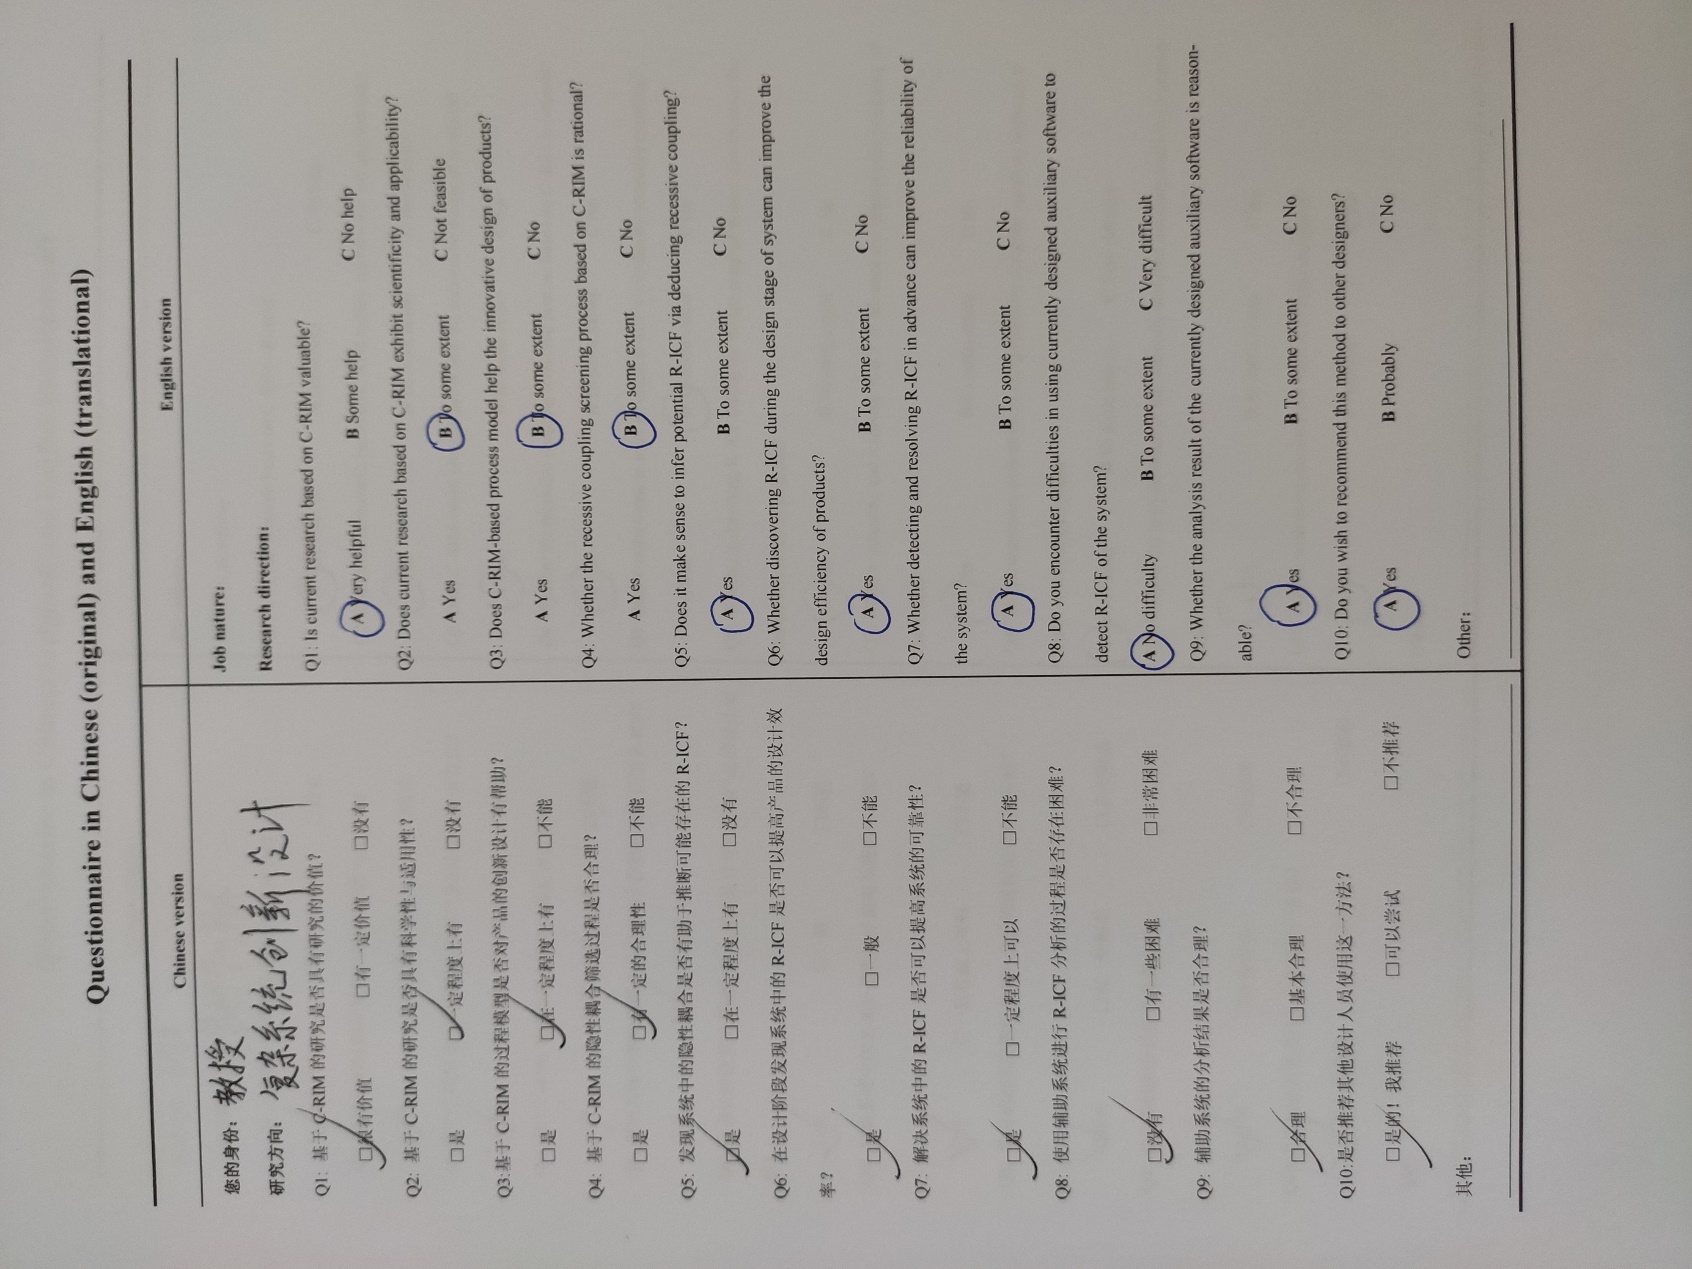


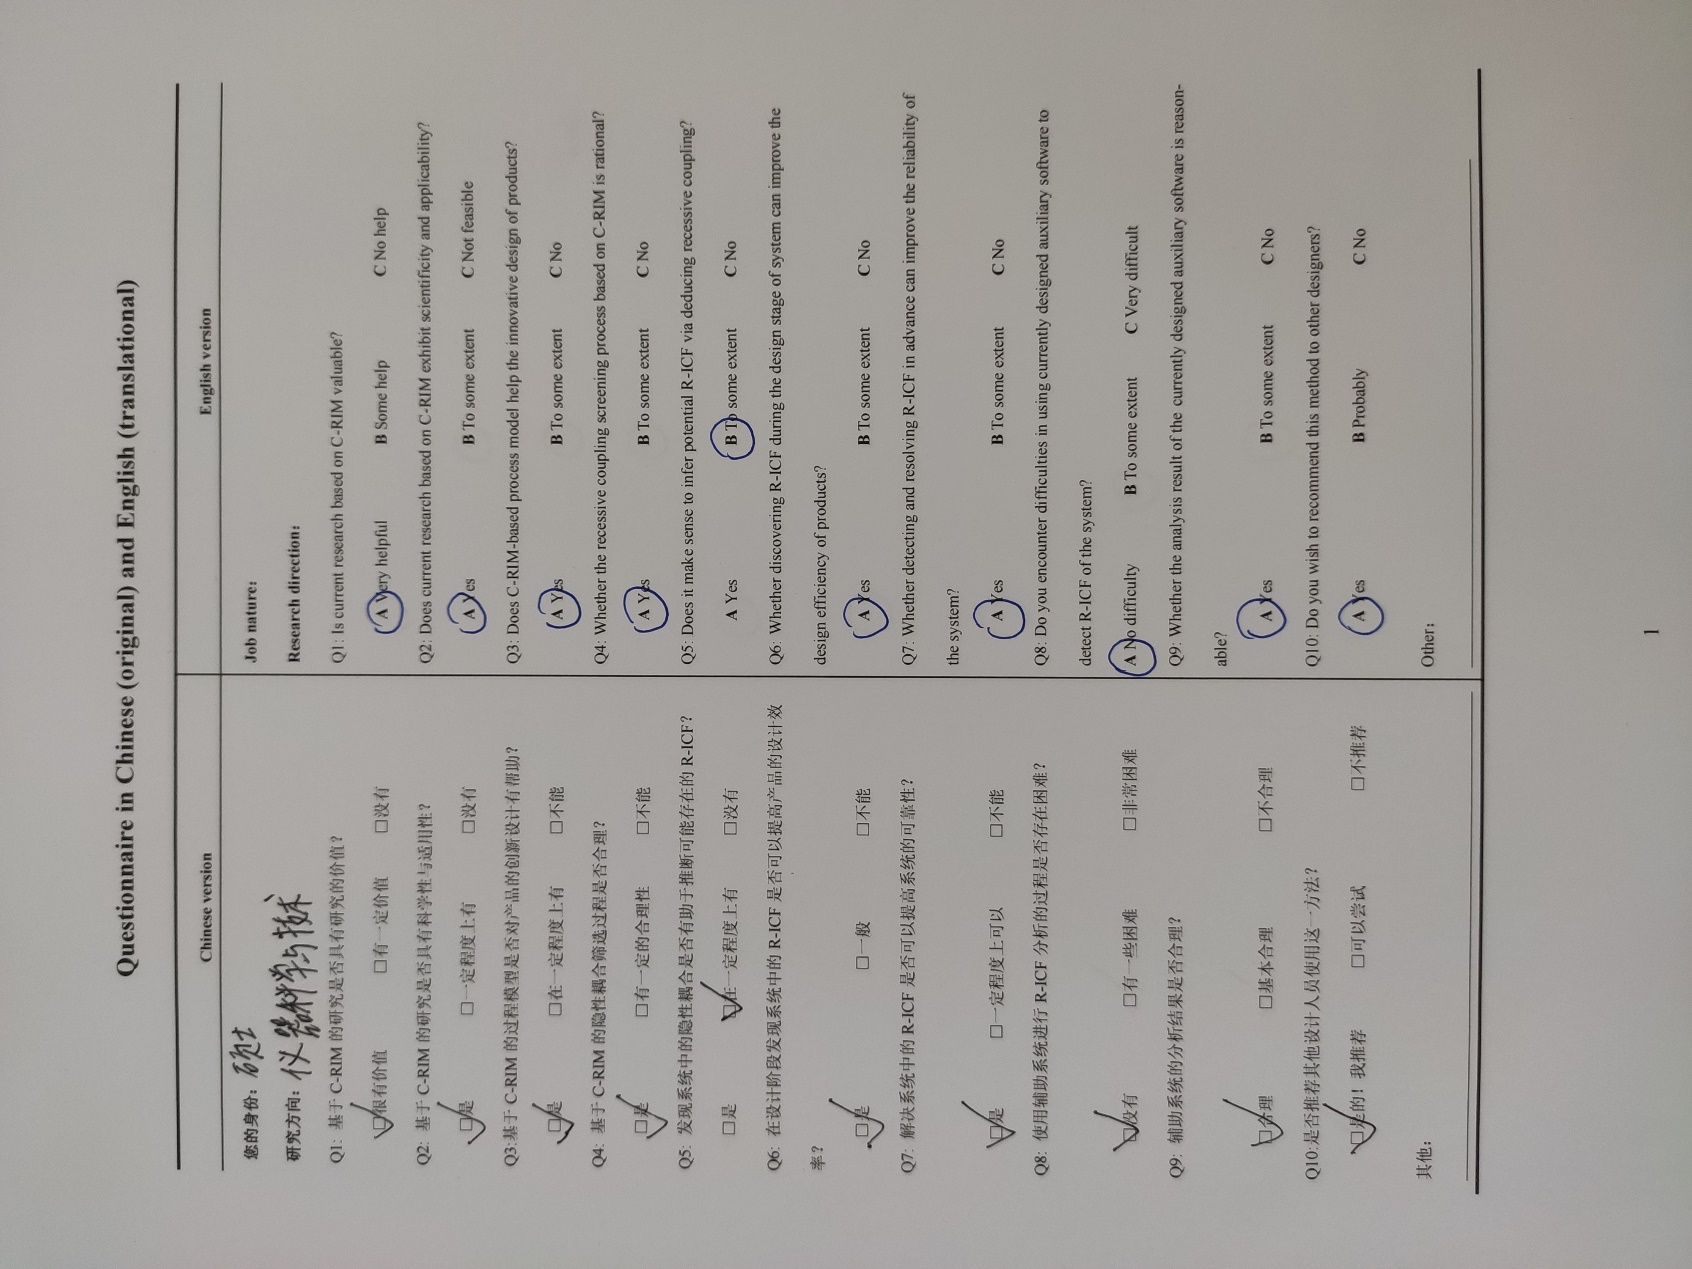


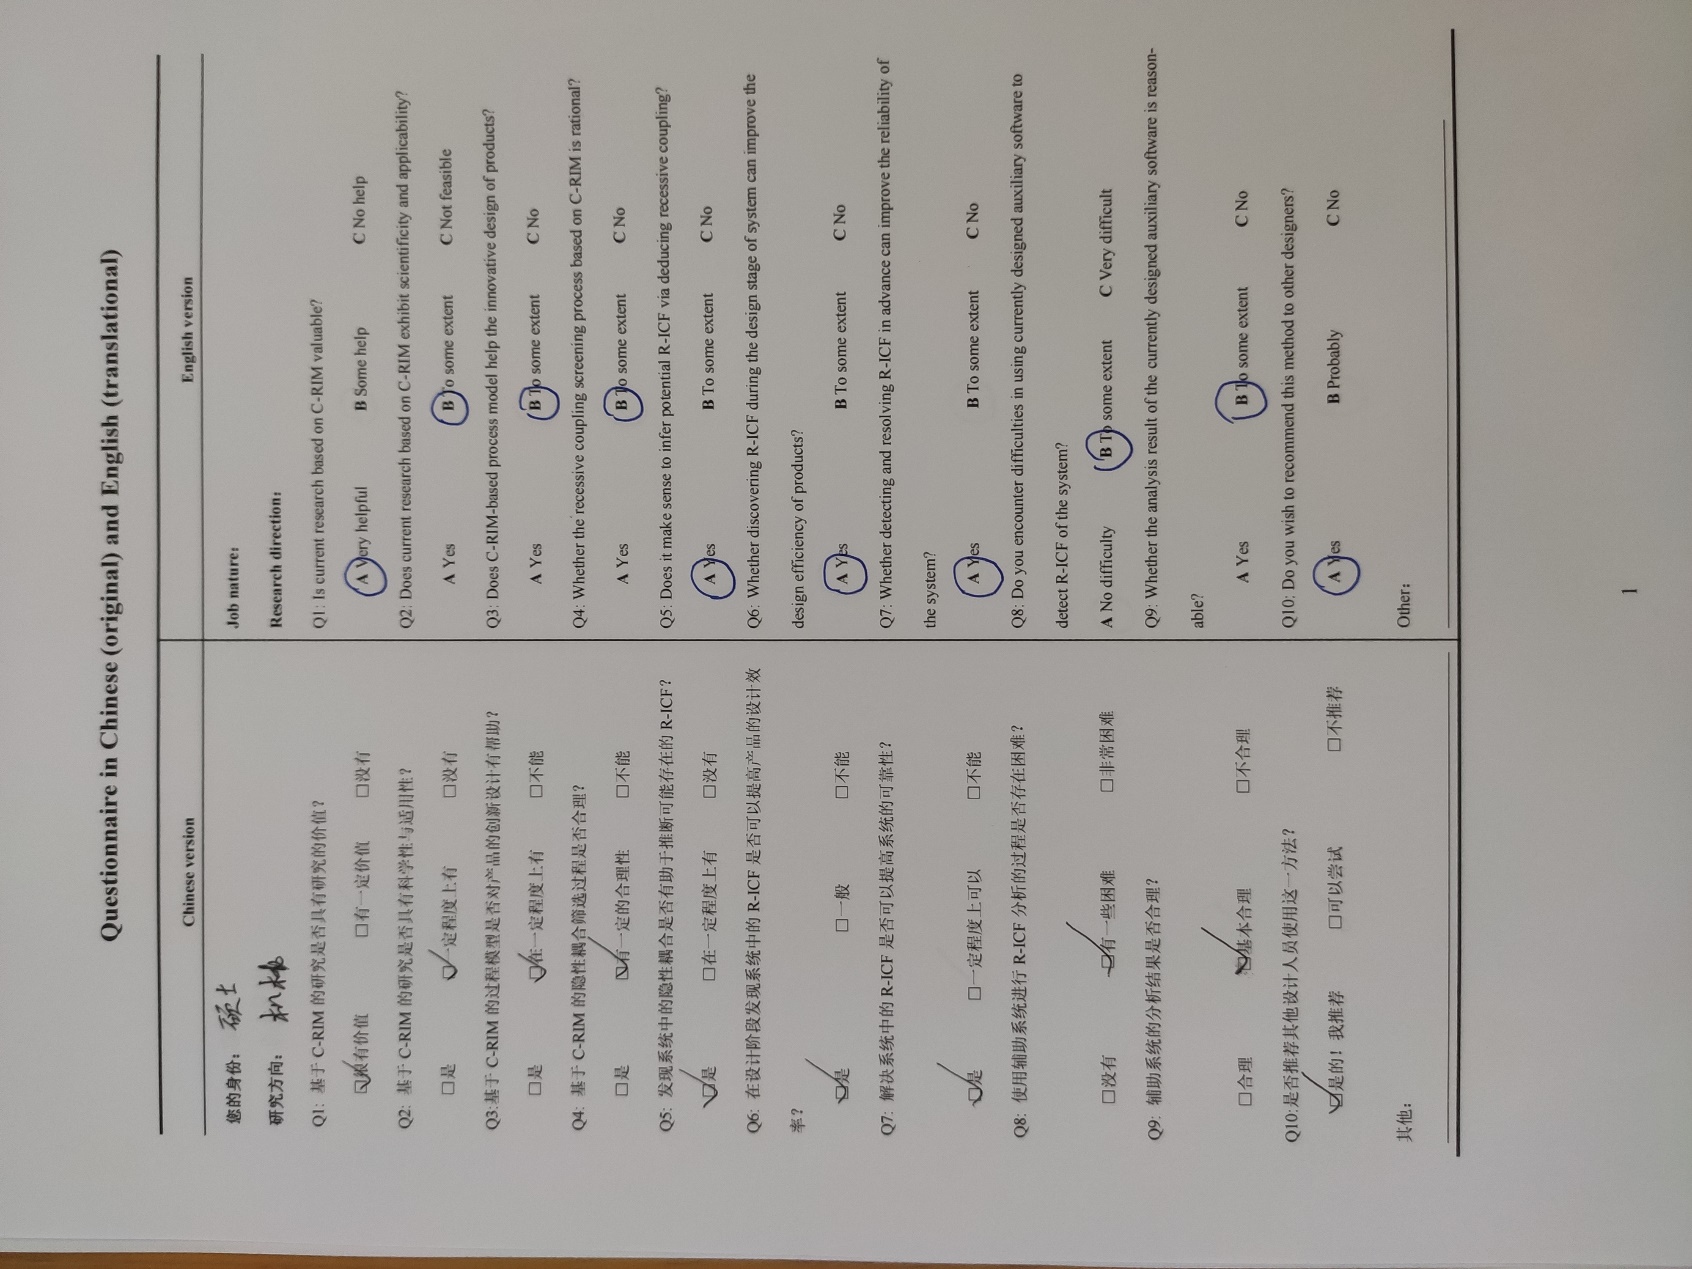


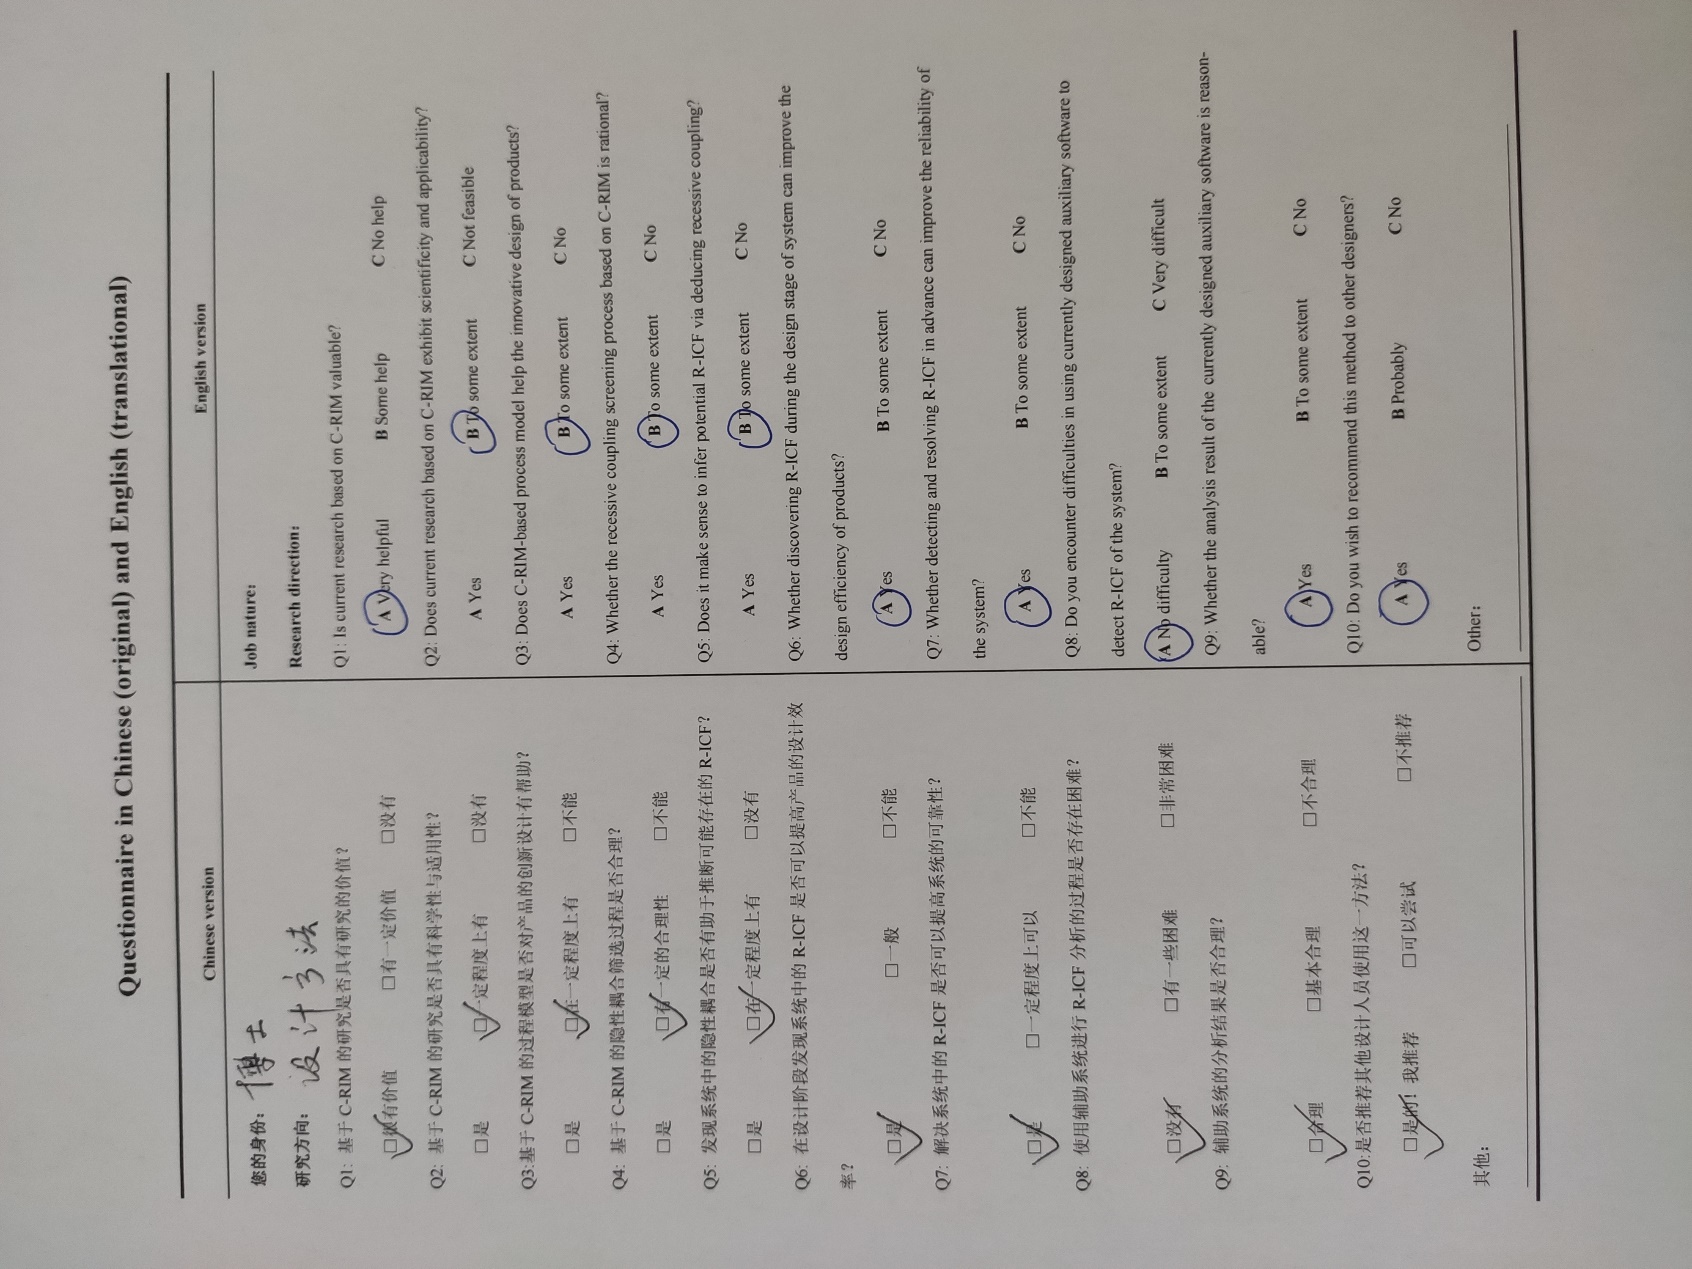


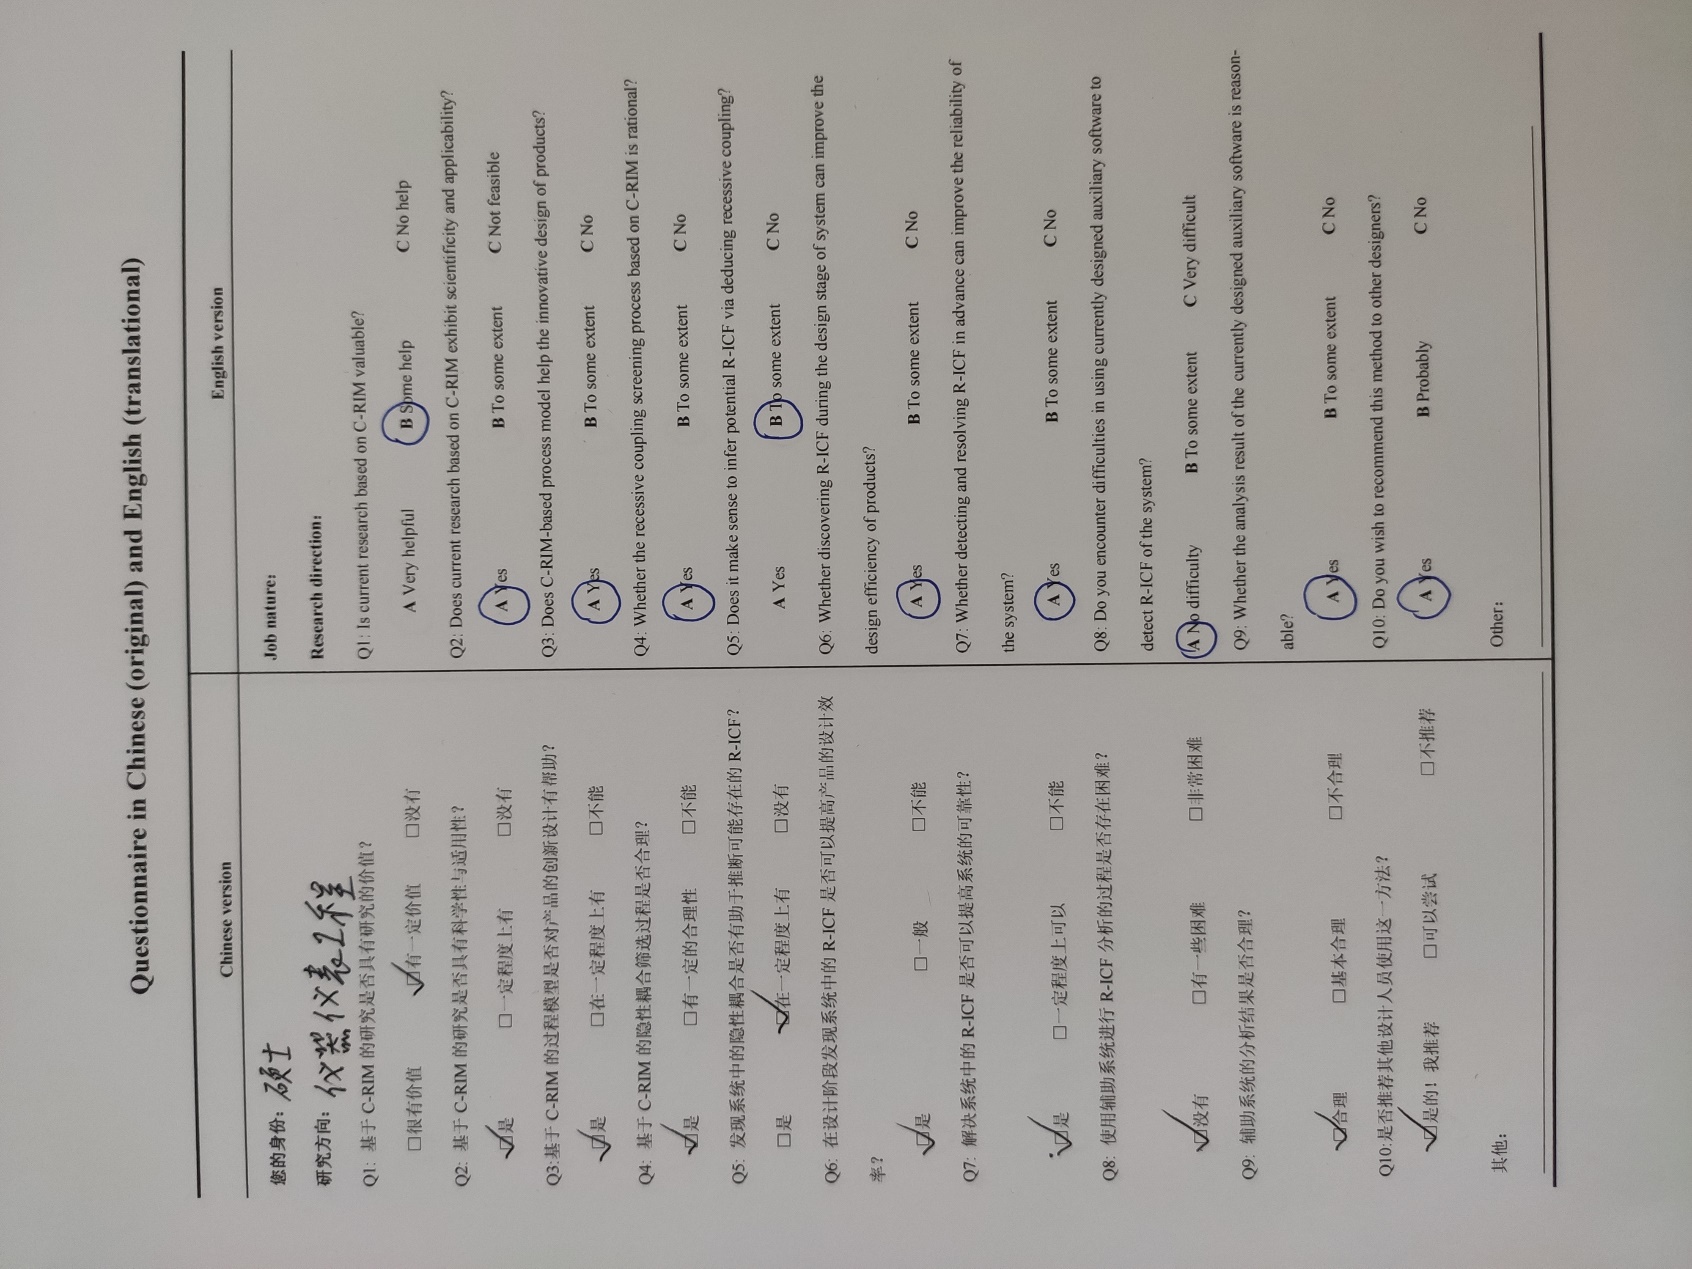


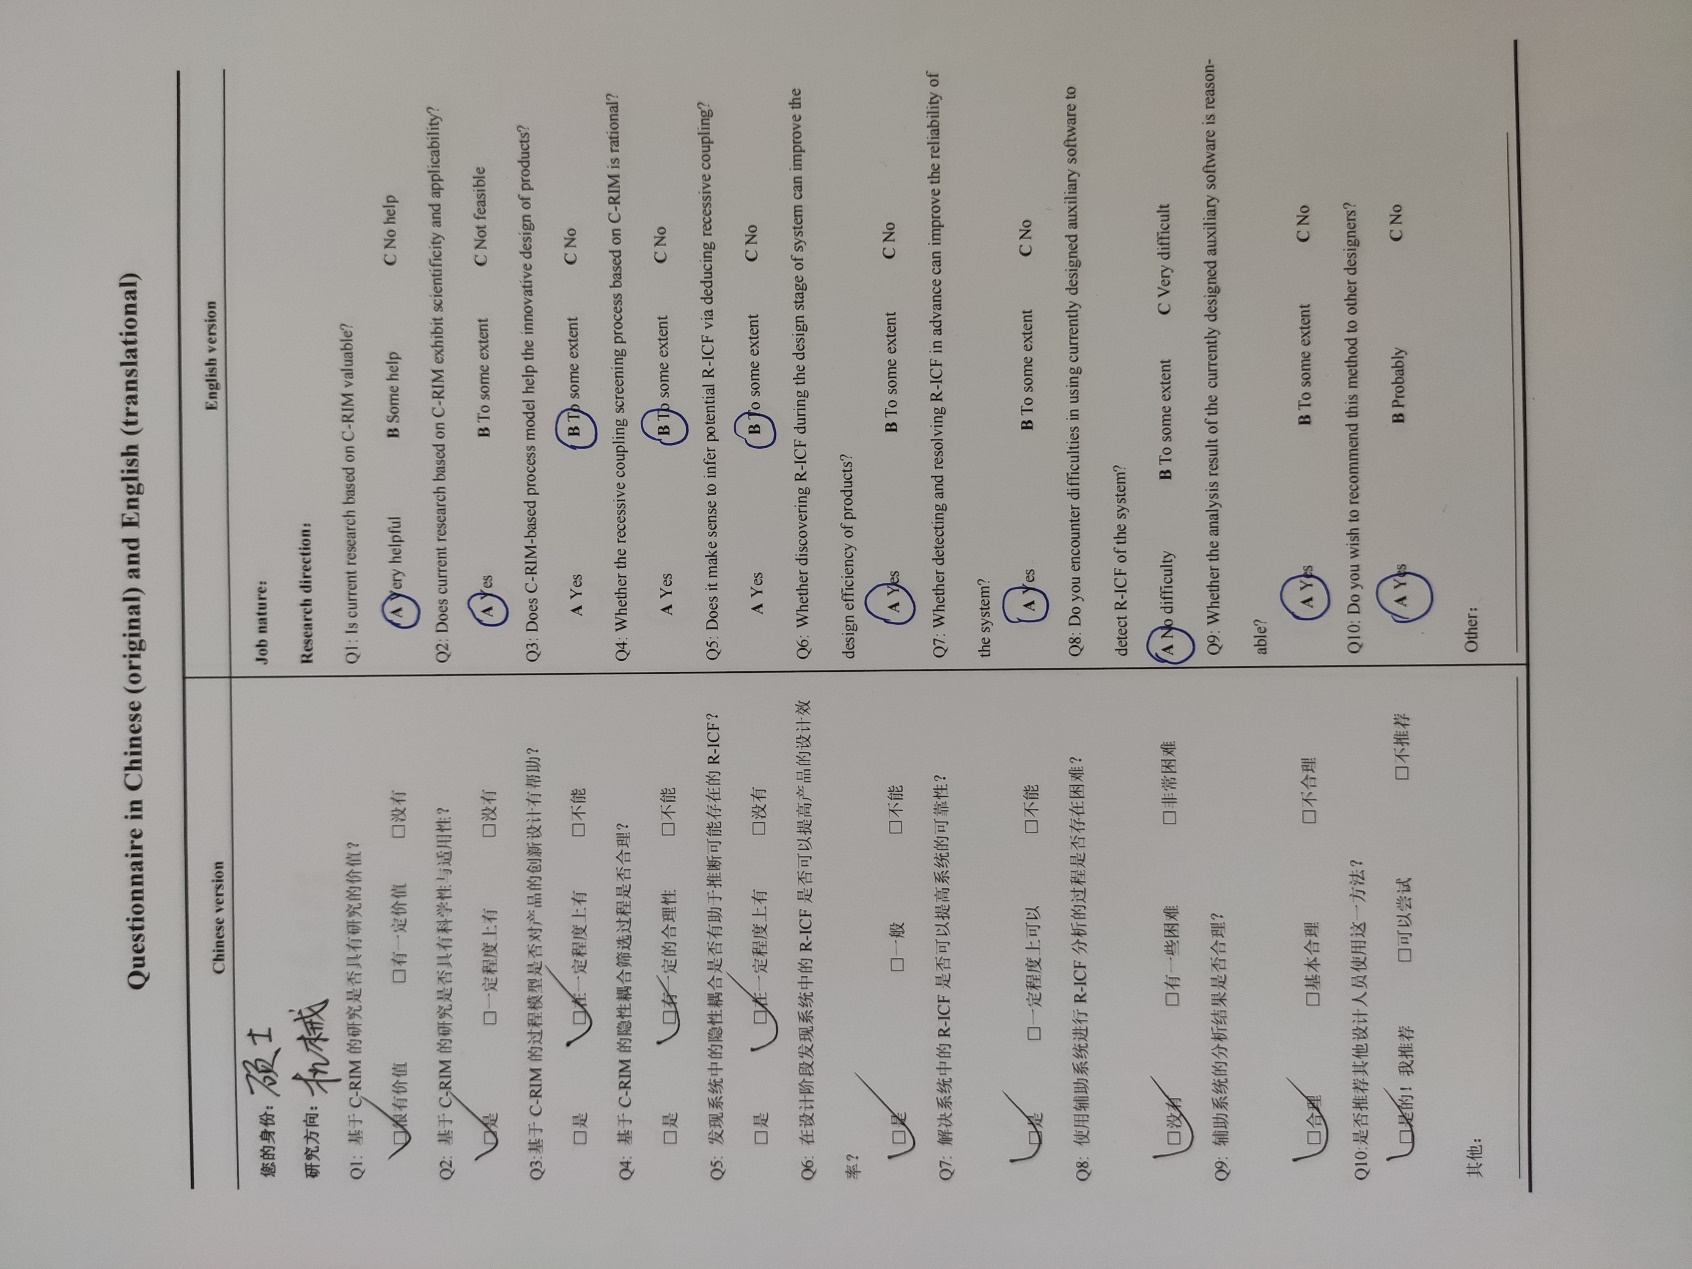


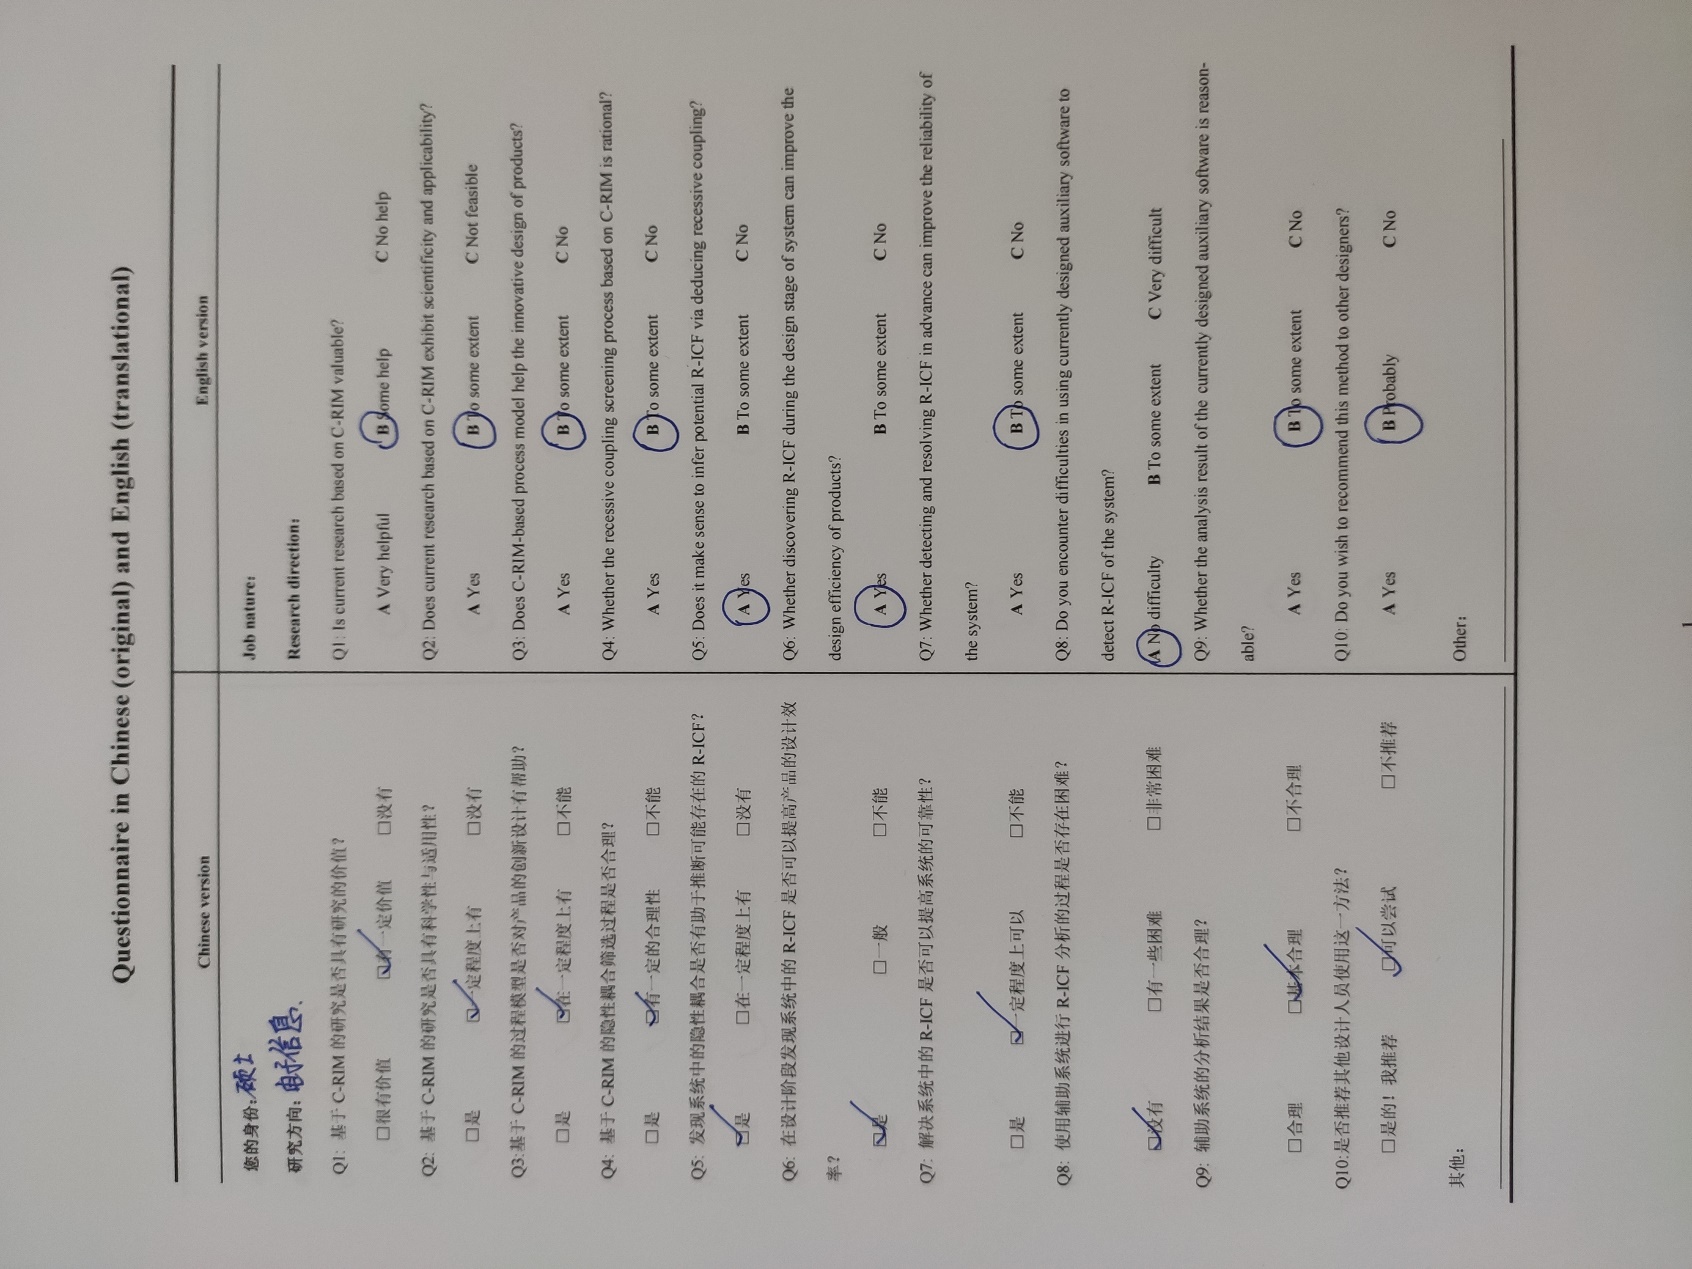


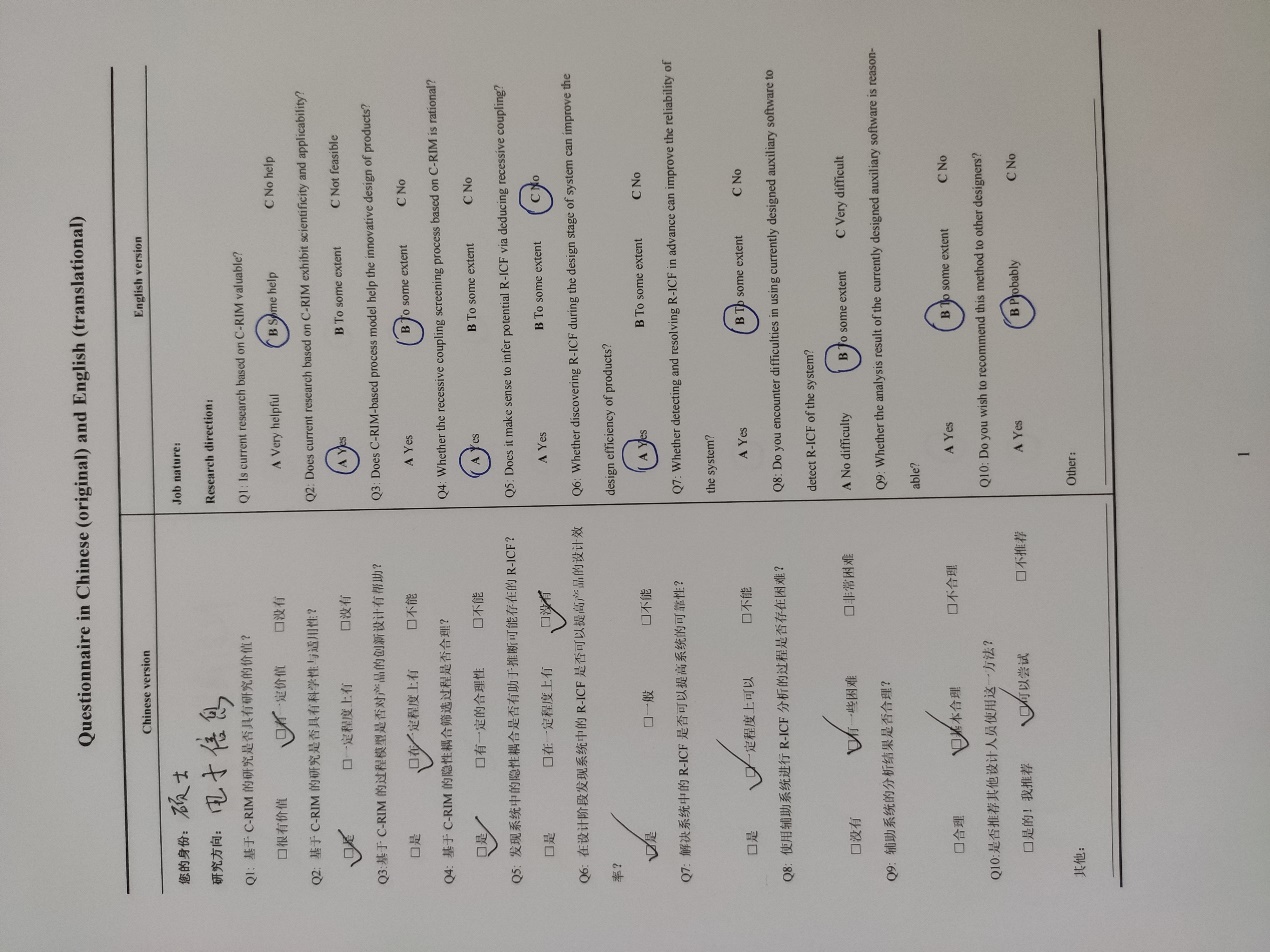


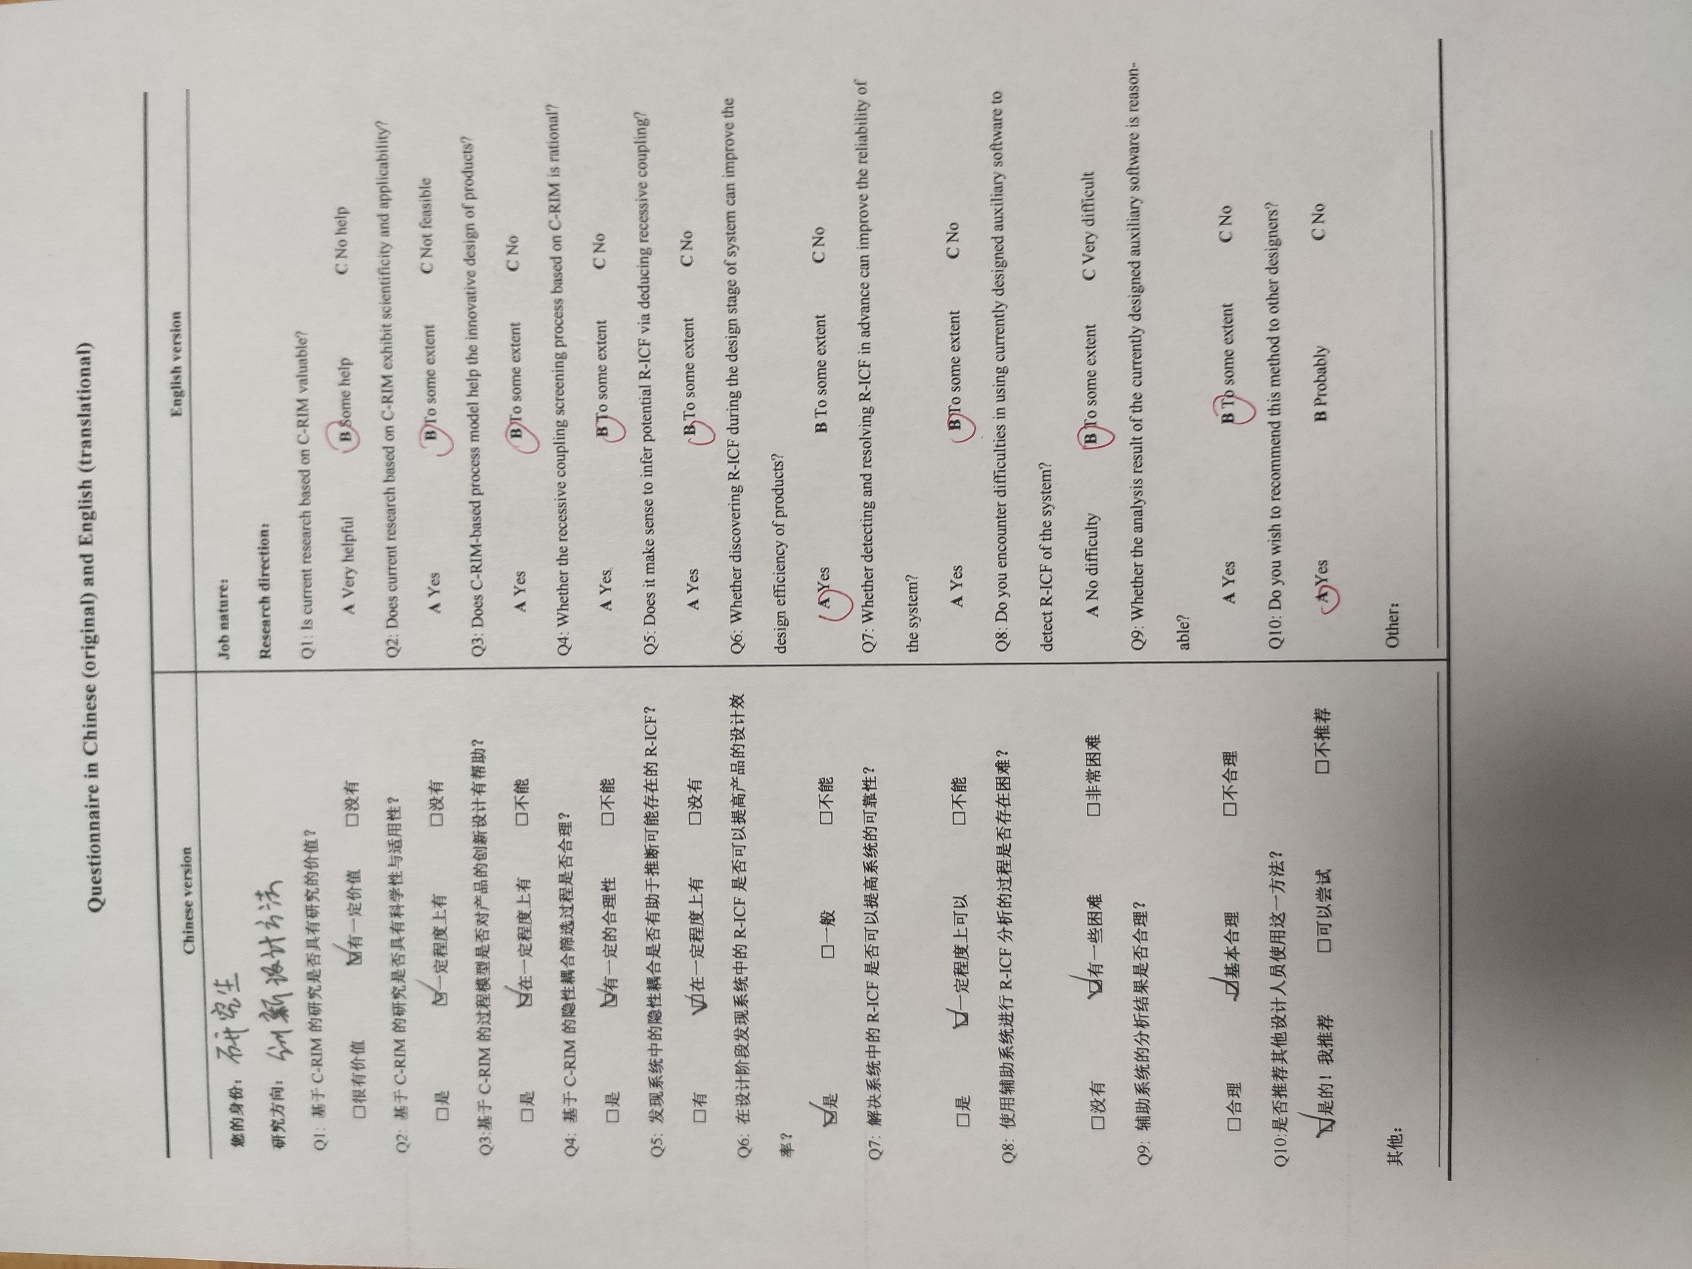


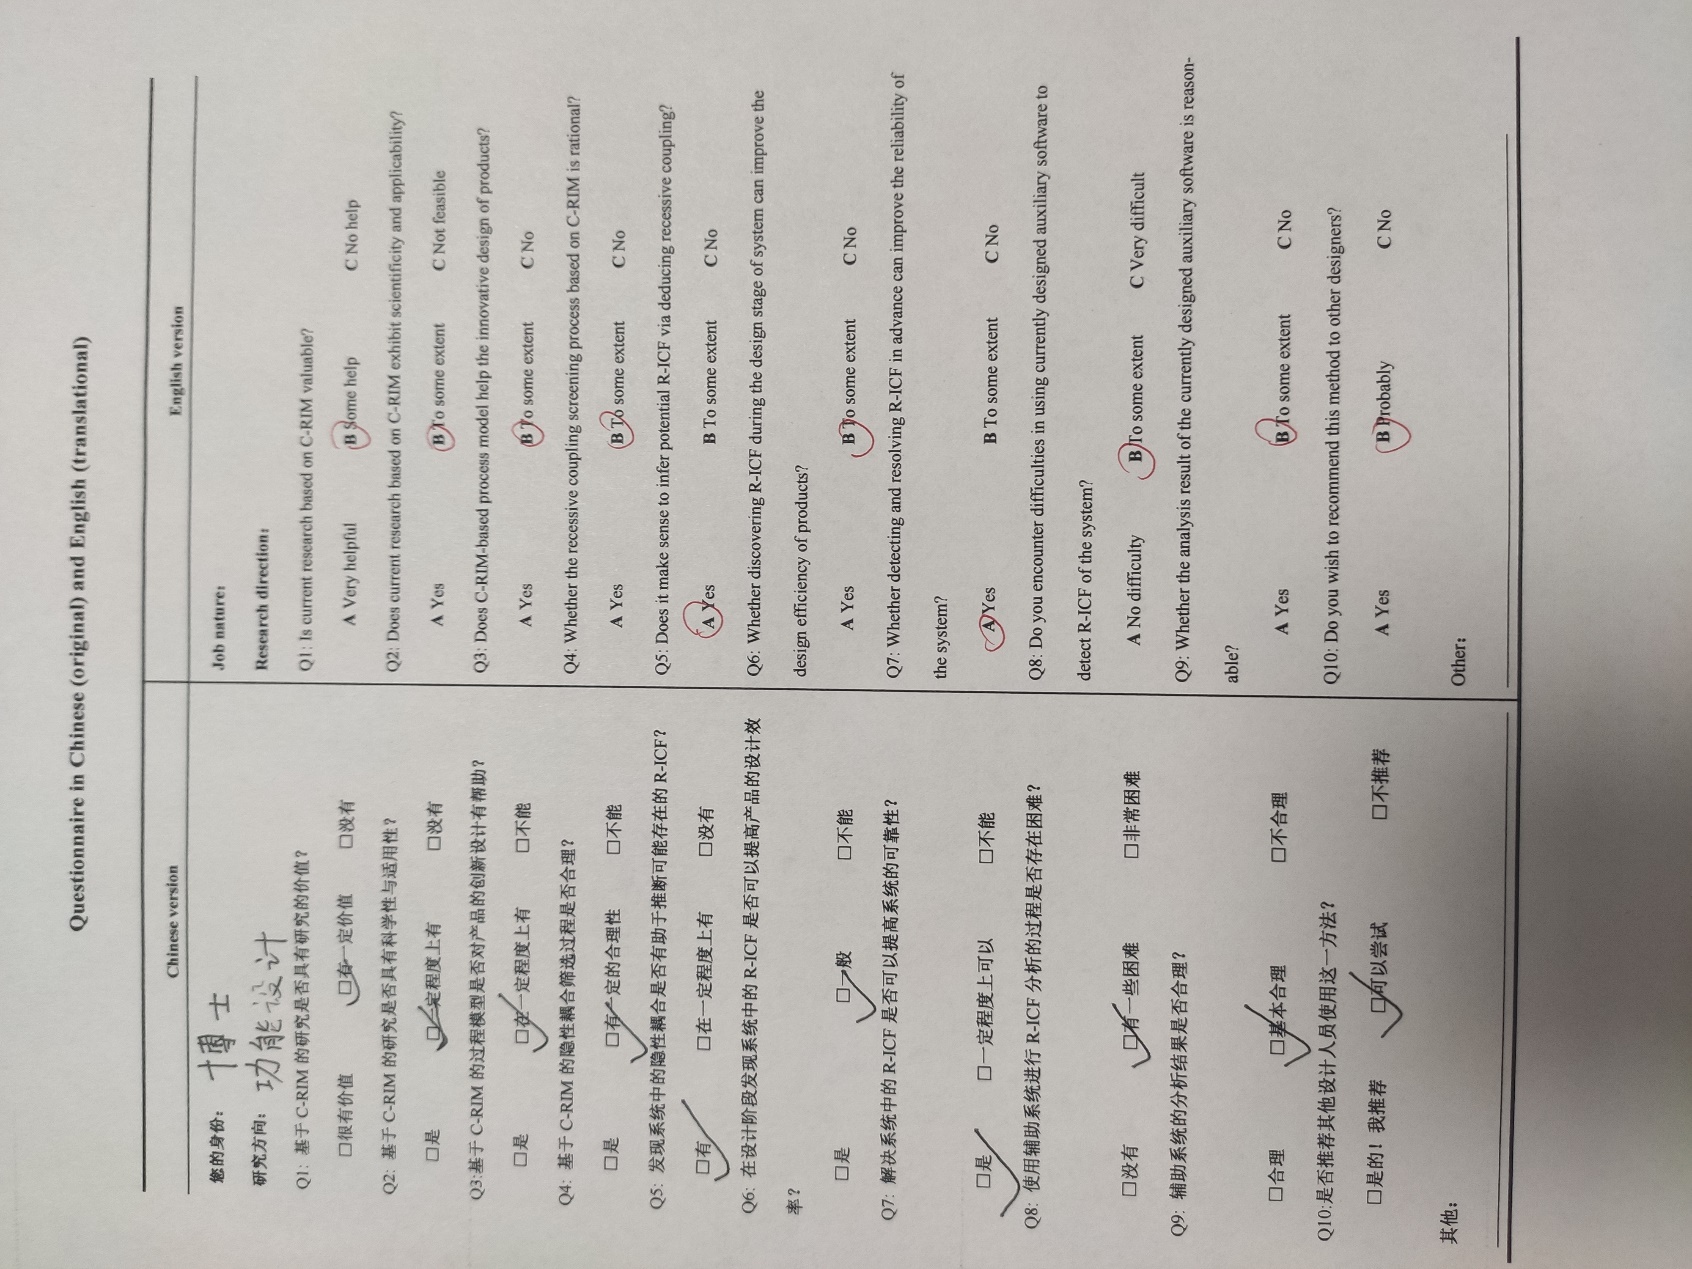


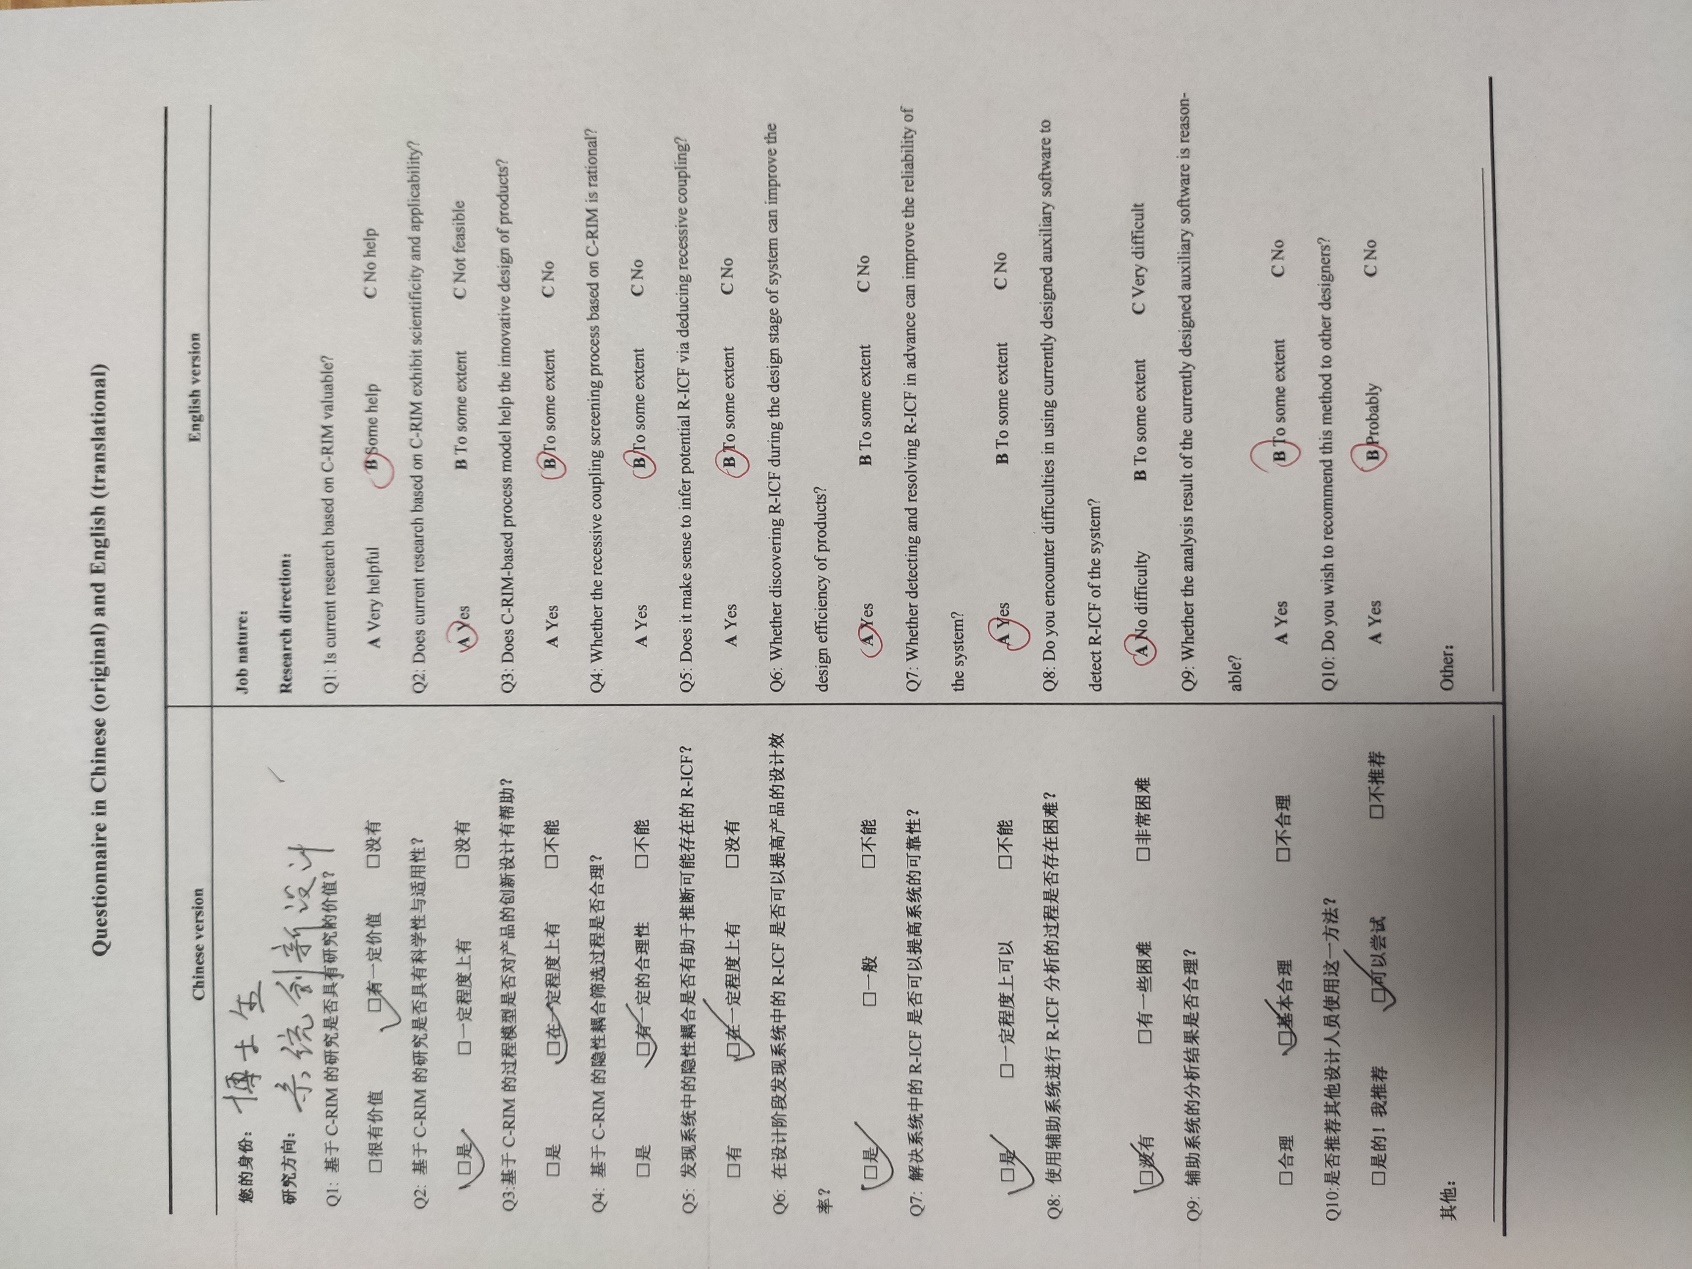


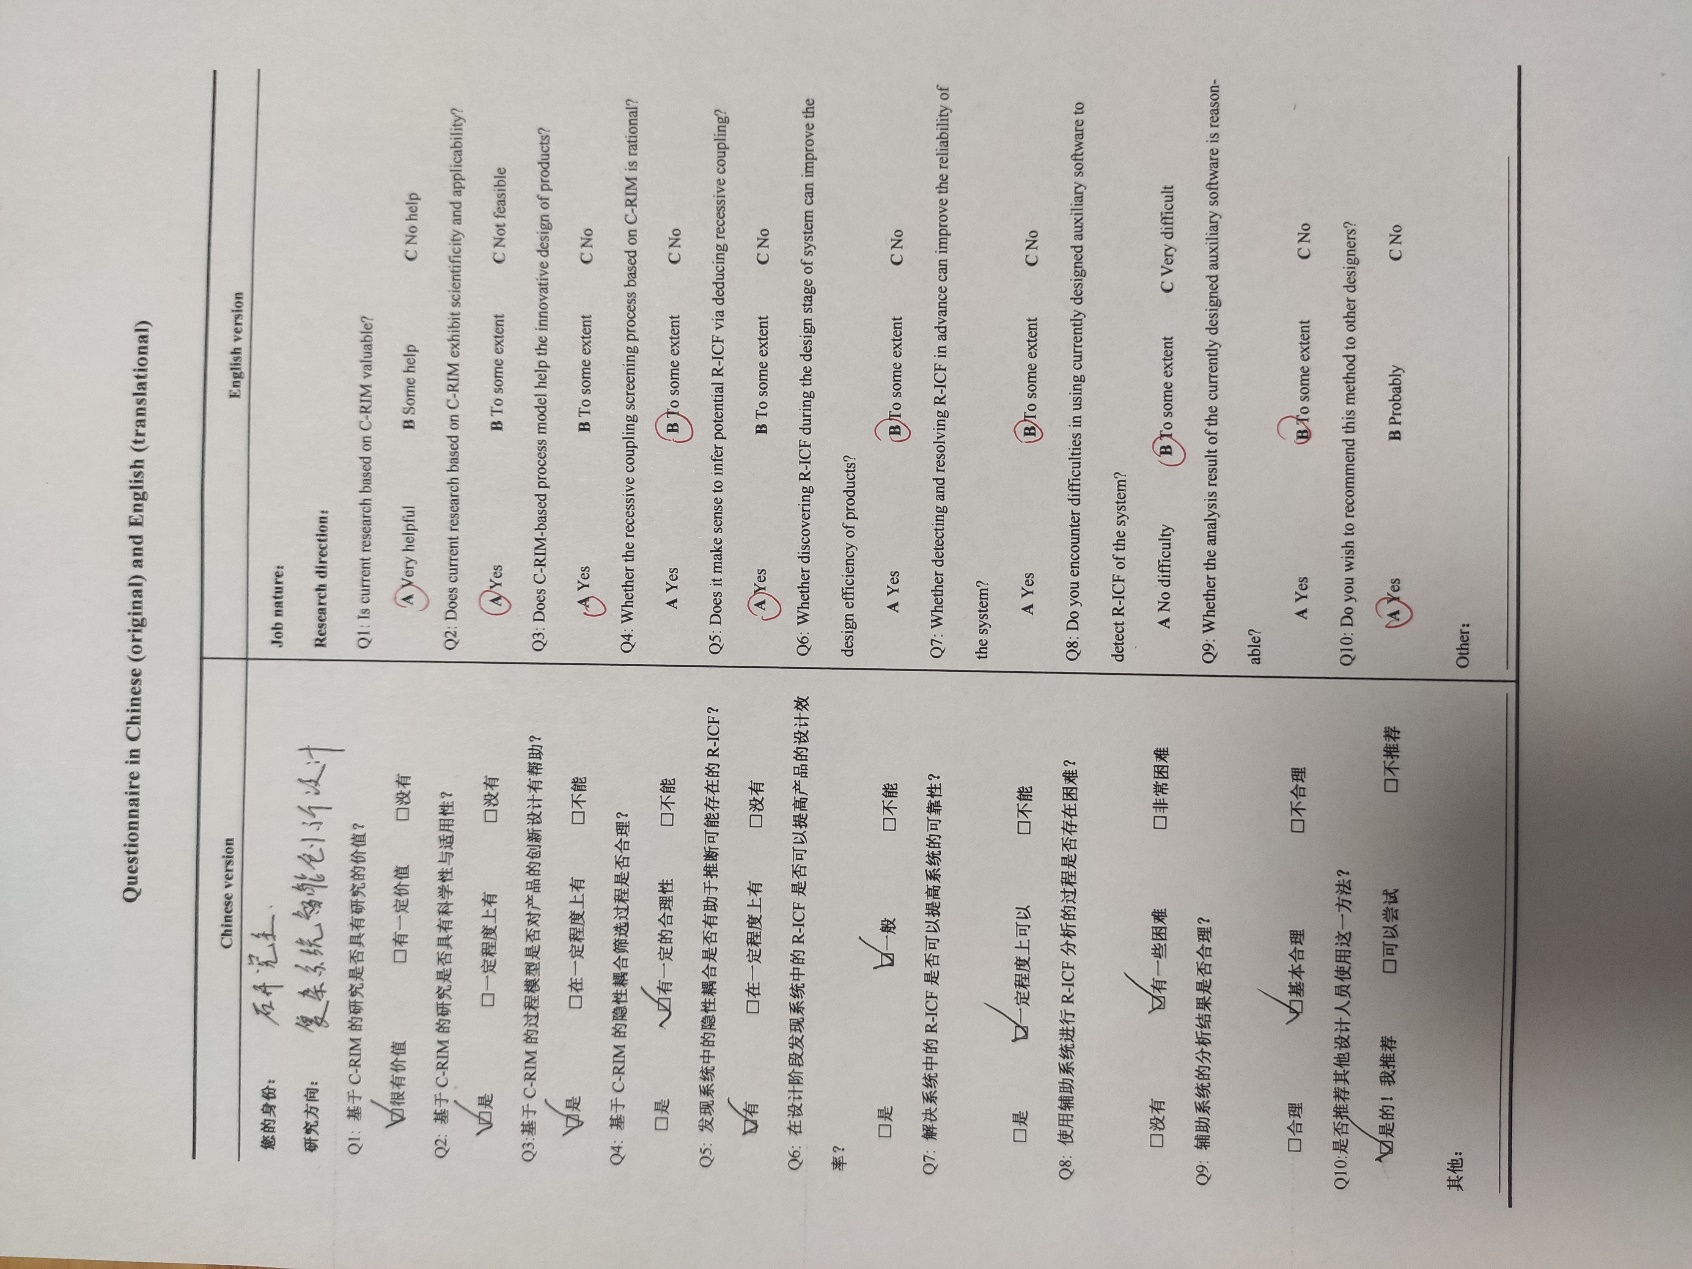


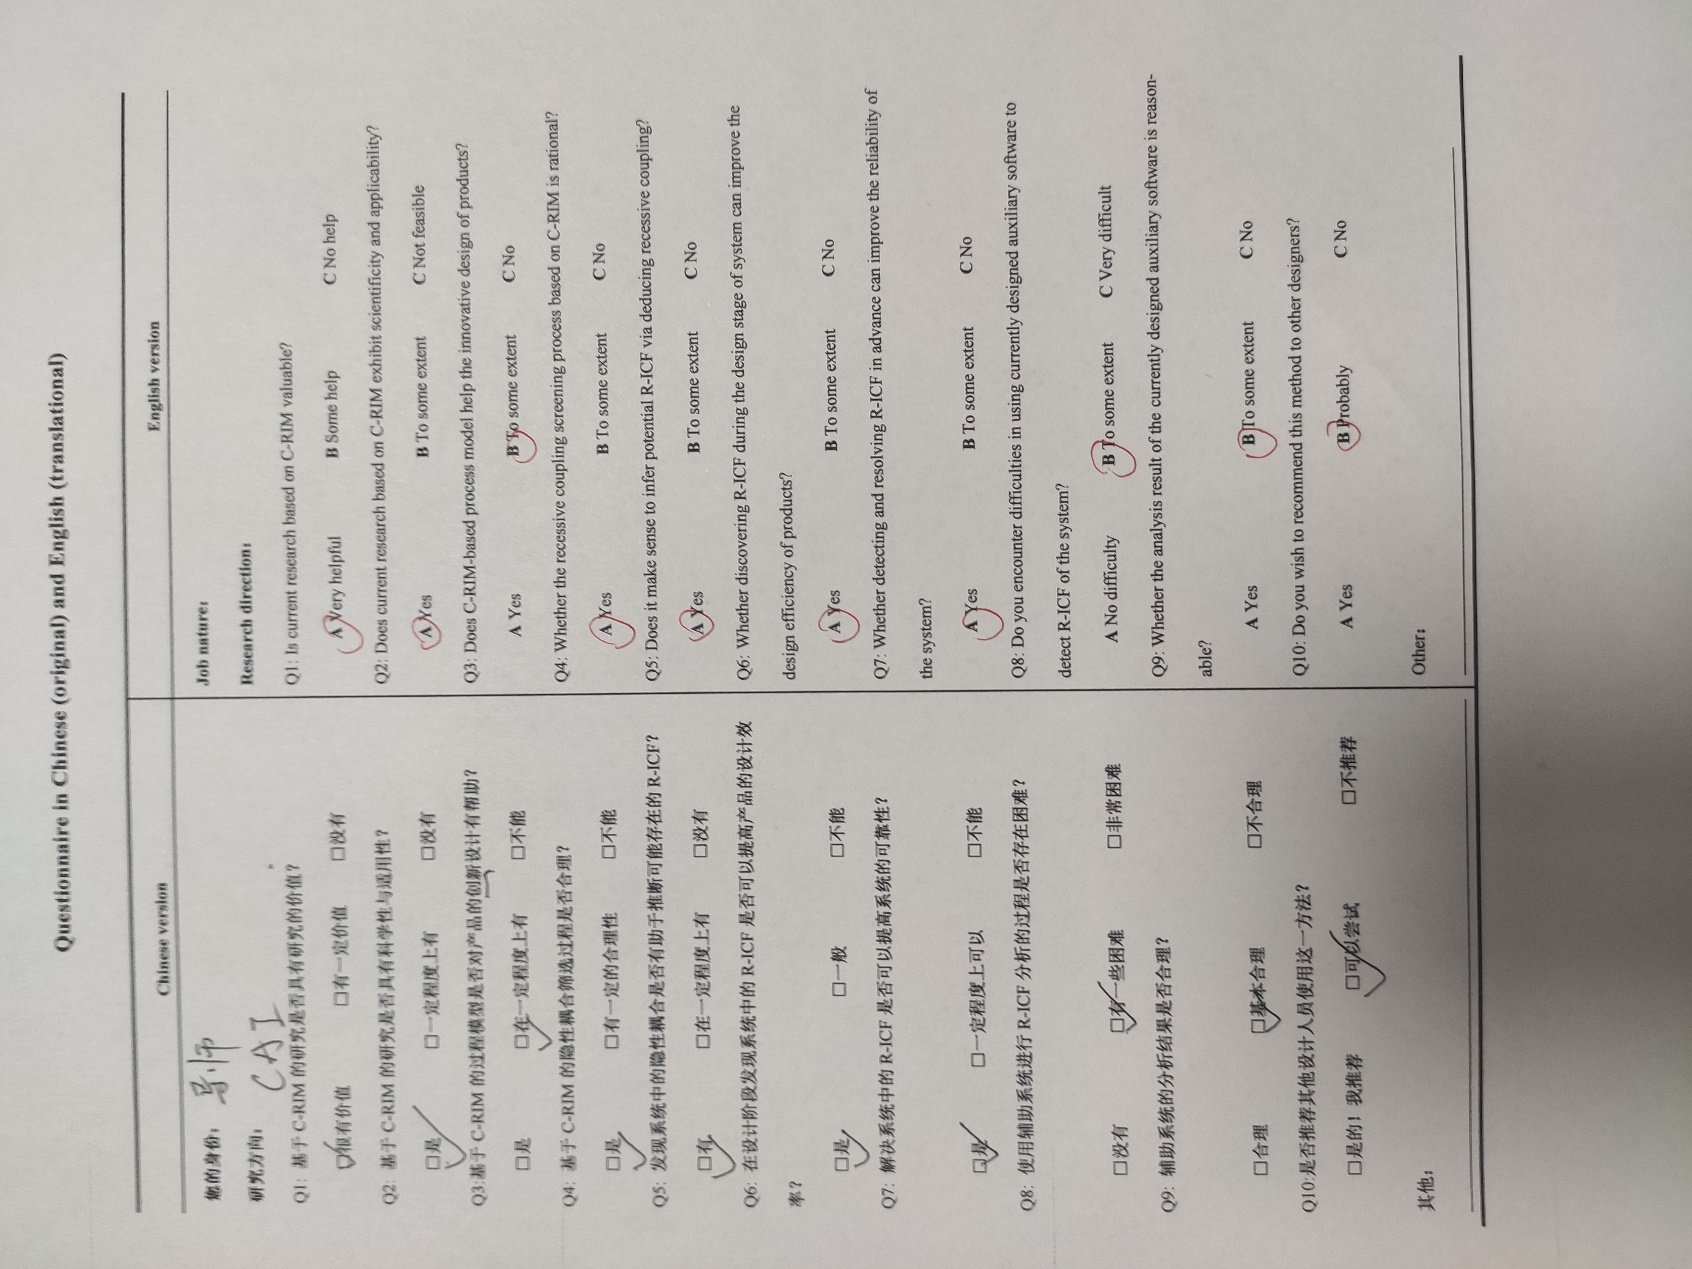


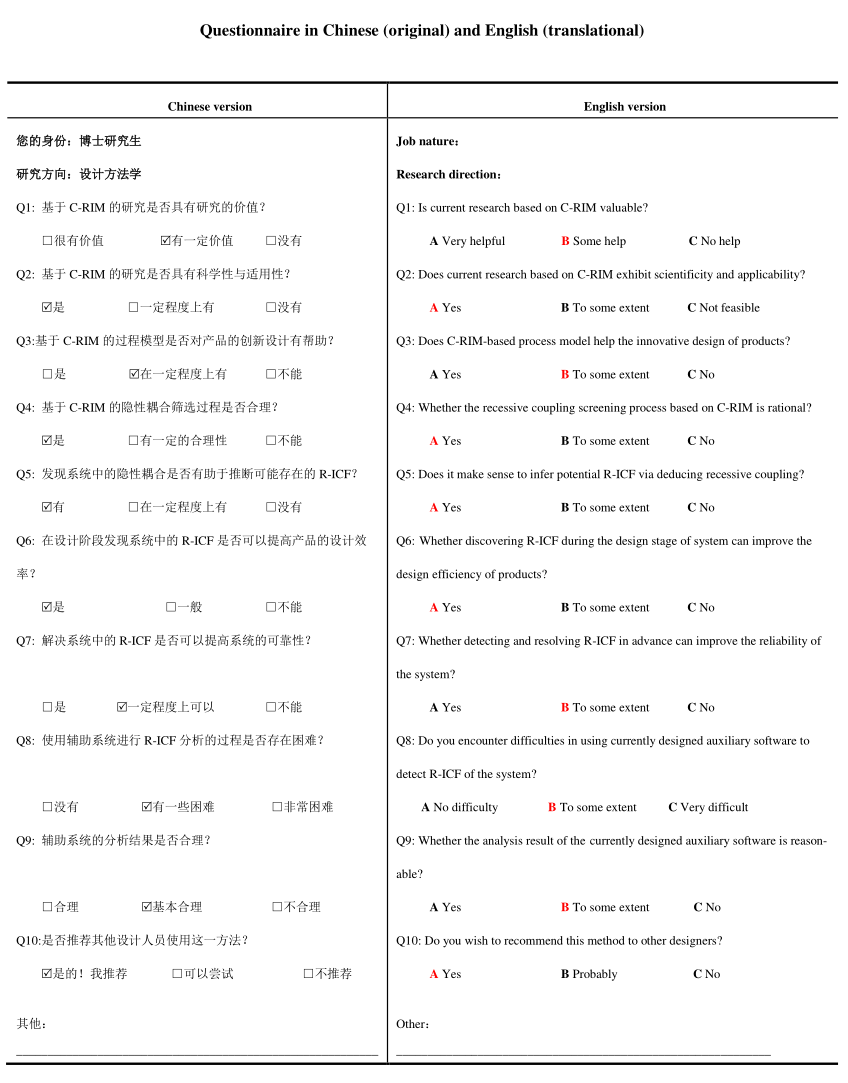


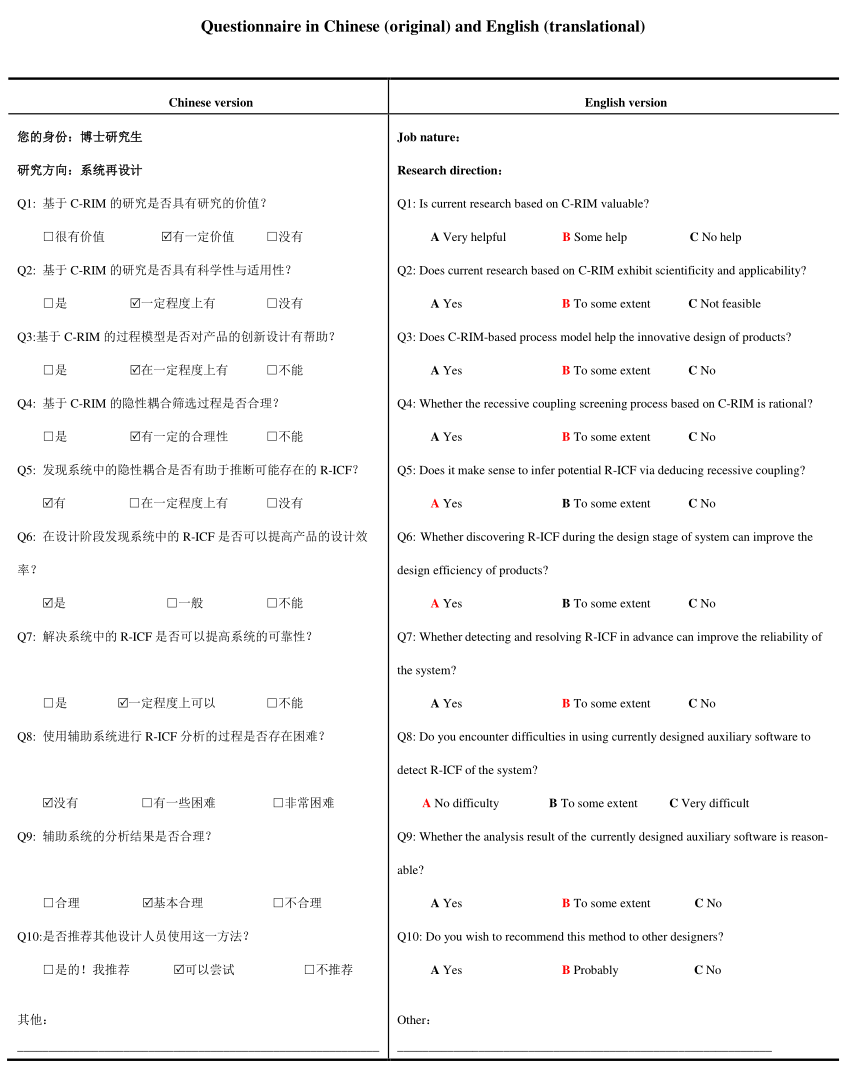


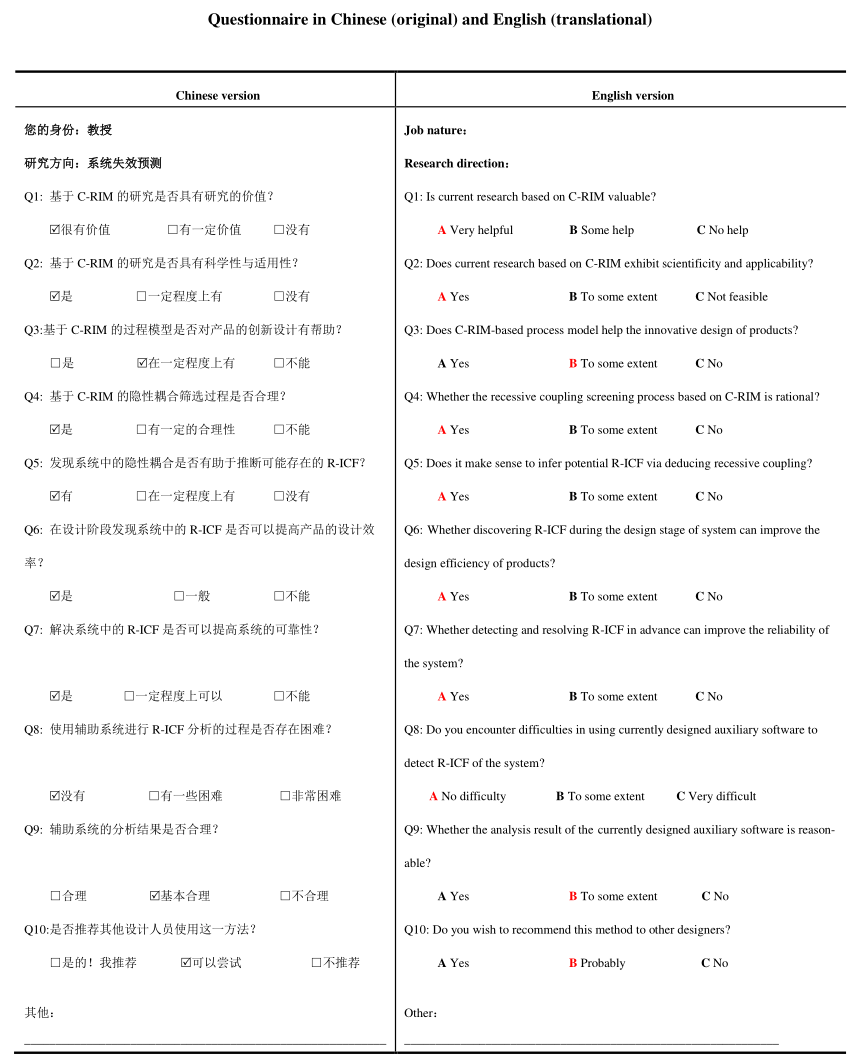


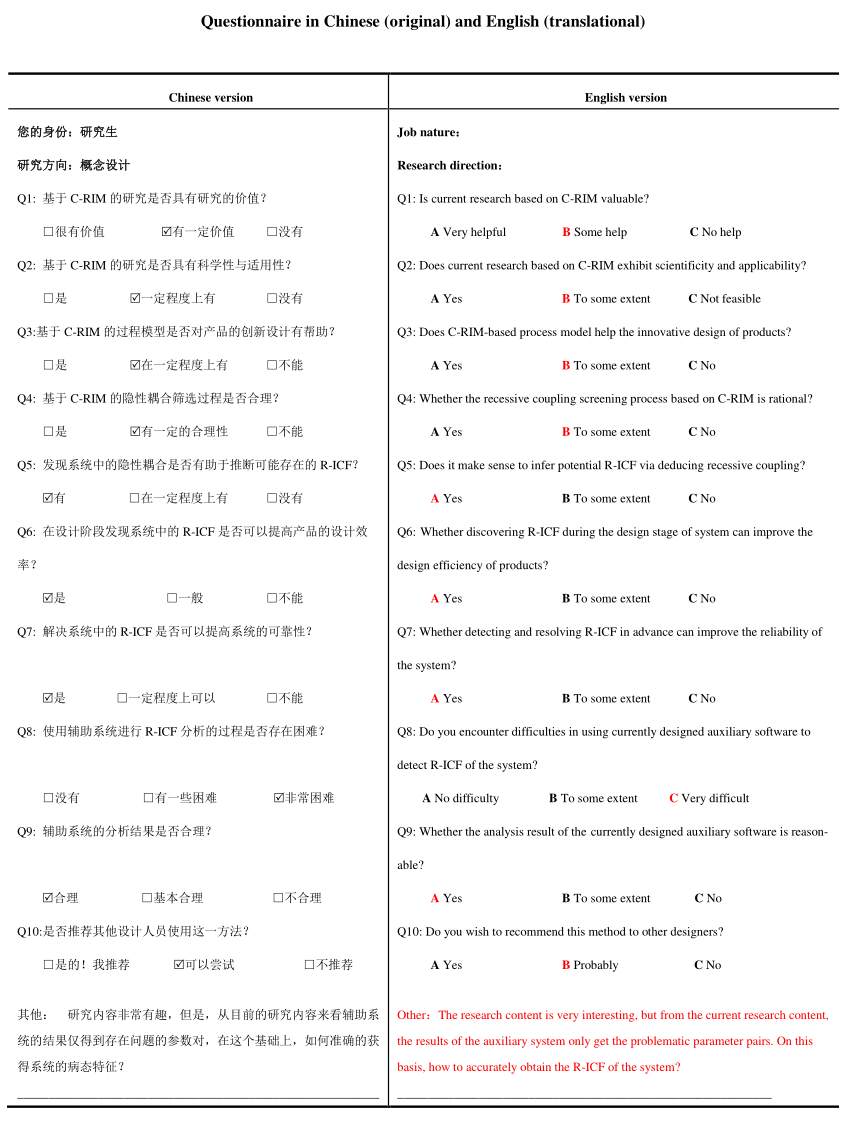


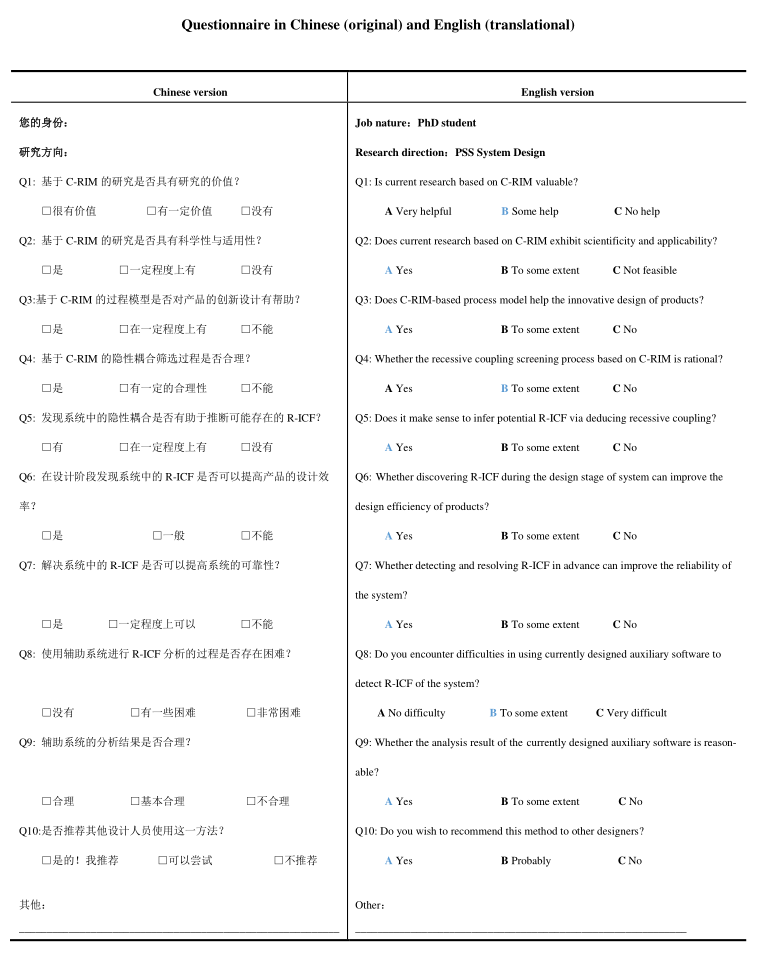


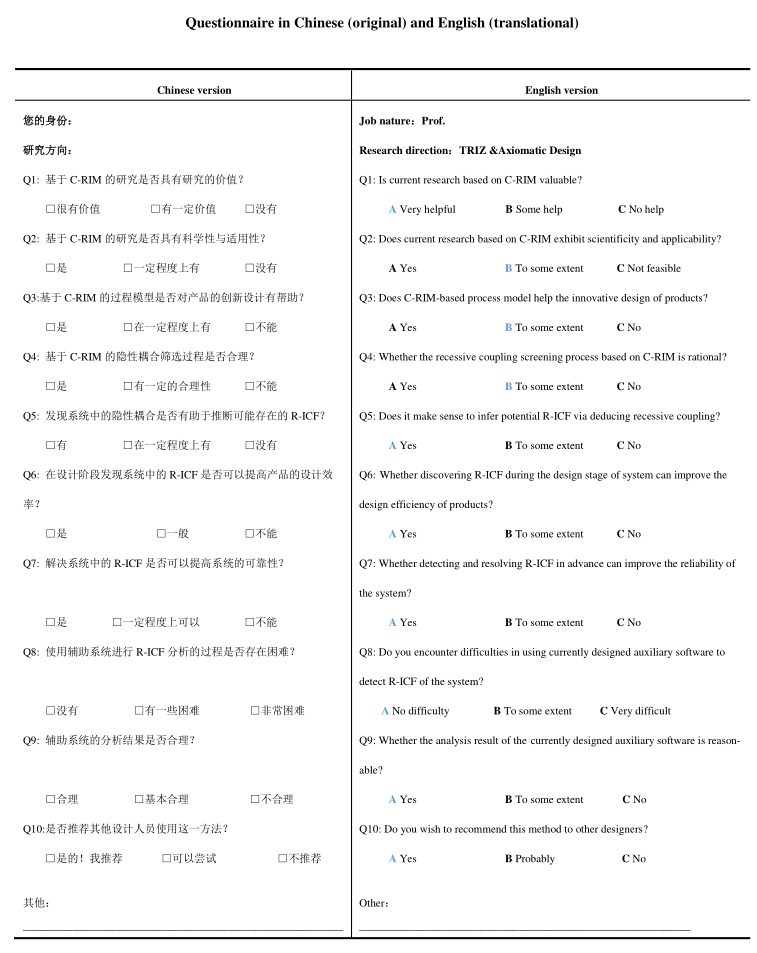


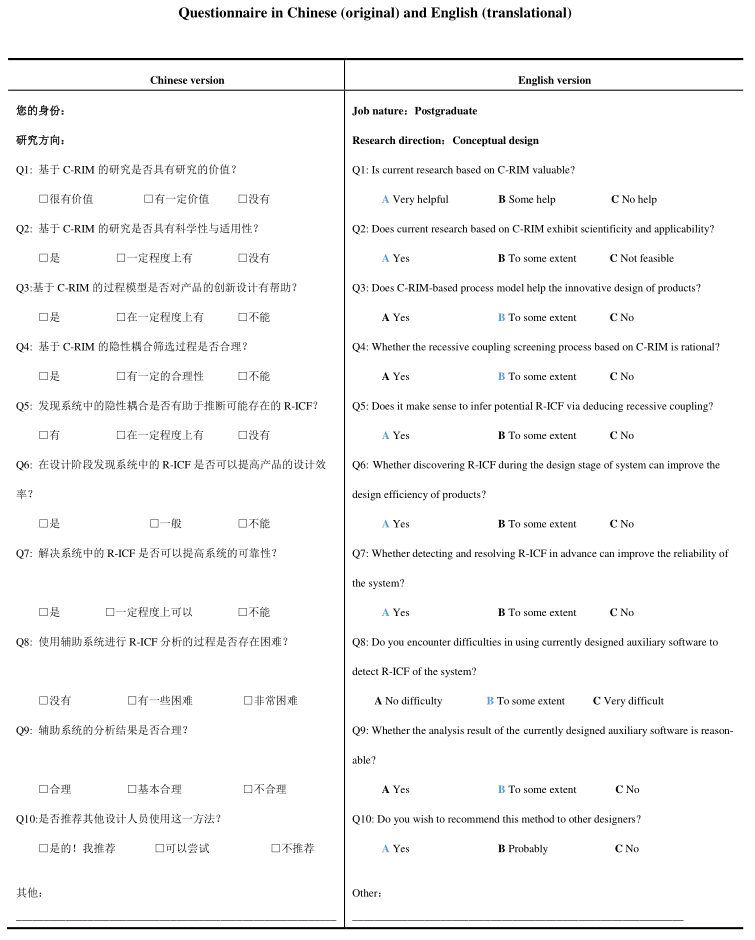


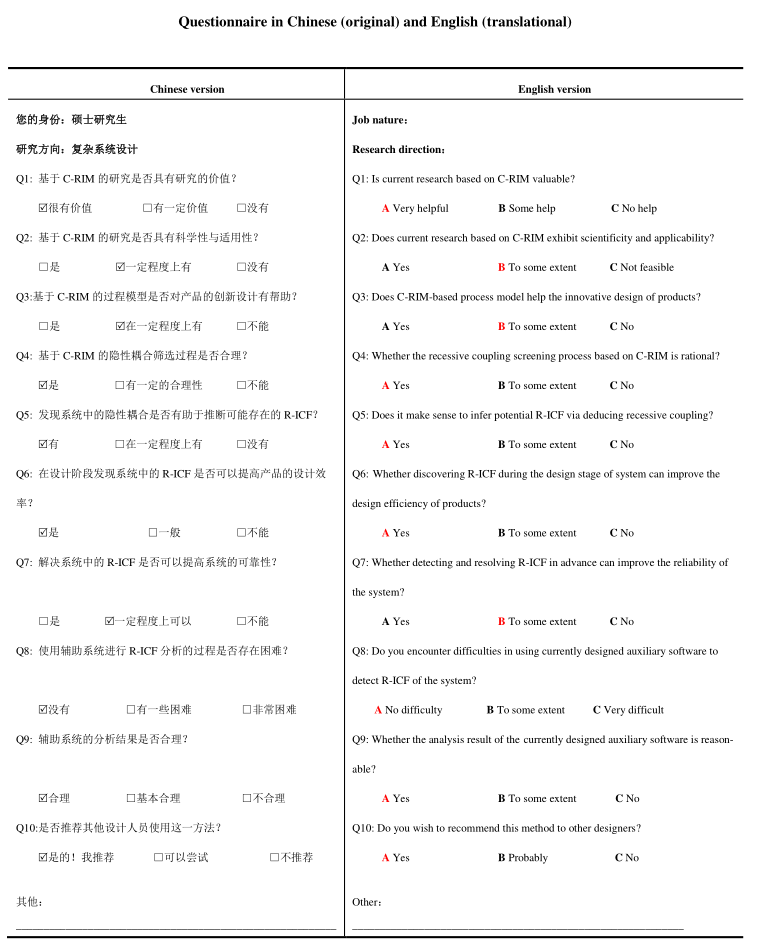


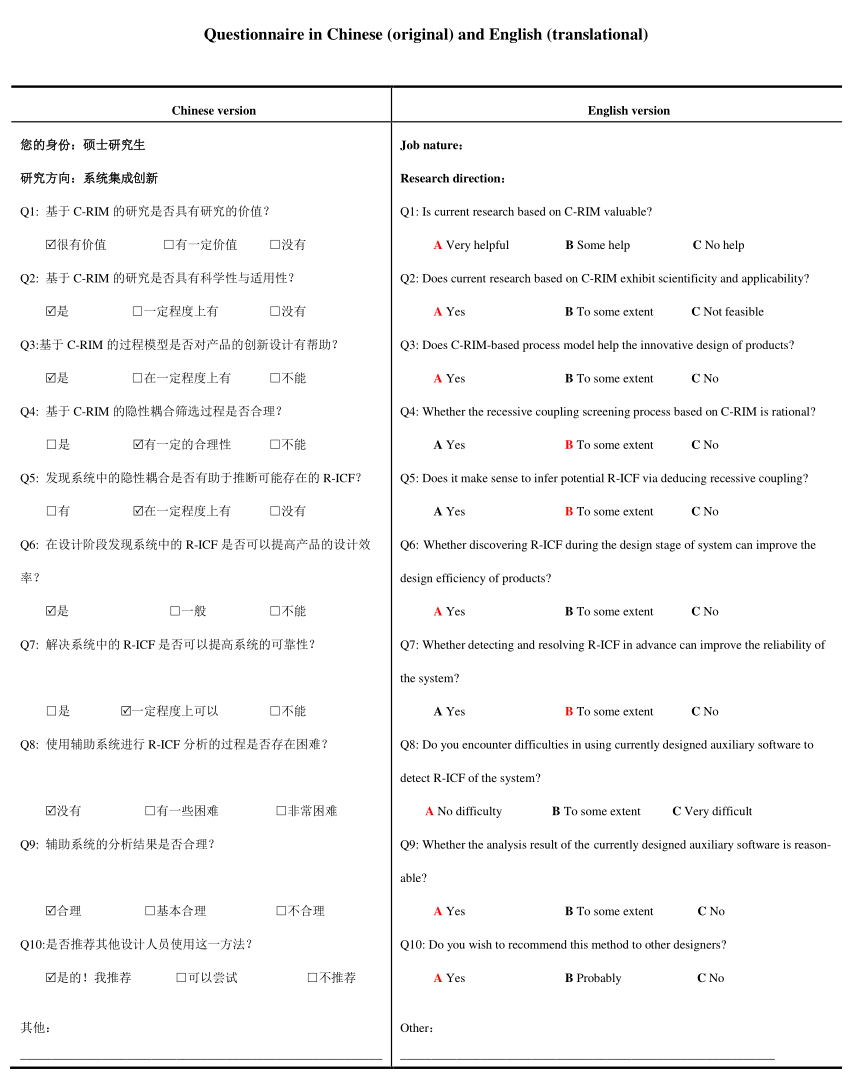


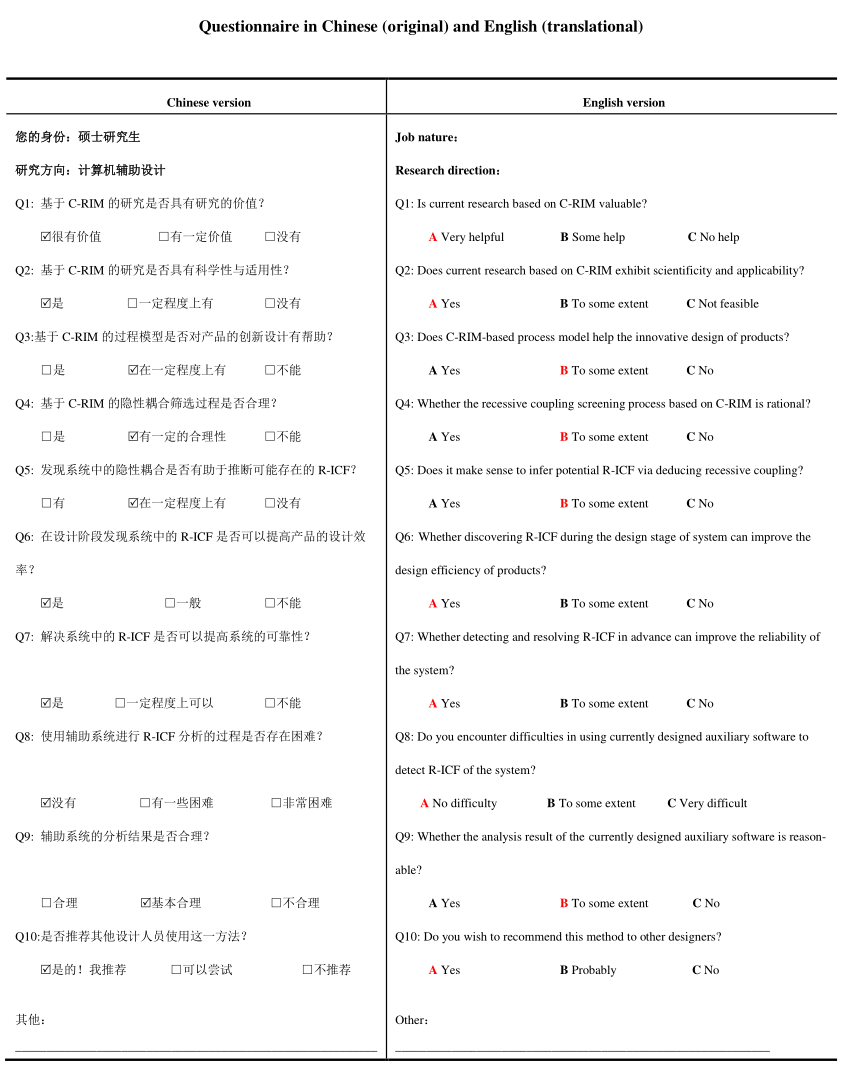


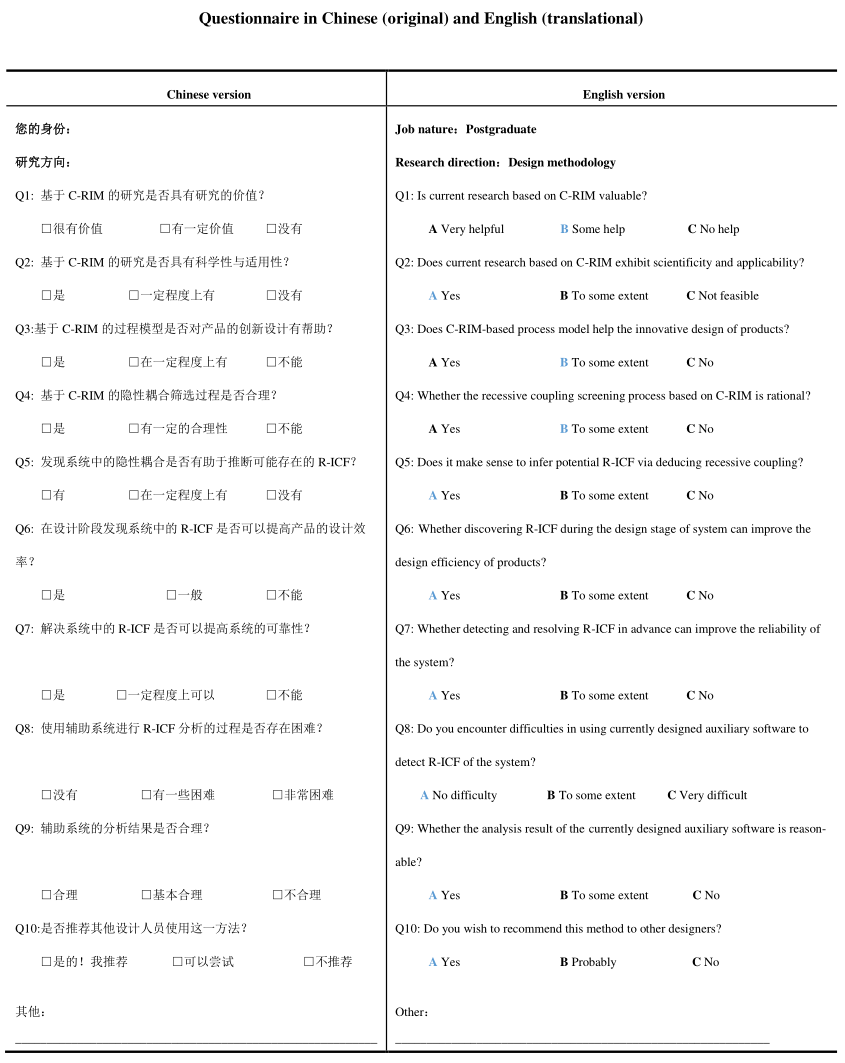

Supplement: Supplementary file 1 [file 39658280]
